# 1 **Dissemination routes of the carbapenem resistance plasmid pOXA-48 in a** 2 **hospital setting**

3 Ricardo León-Sampedro<sup>1,2,a</sup>, Javier DelaFuente<sup>1,a</sup>, Cristina Díaz-Agero<sup>3,a</sup>, Thomas  
4 Crellen<sup>4,5</sup>, Patrick Musicha<sup>4,5</sup>, Jerónimo Rodríguez-Beltrán<sup>1,2</sup>, Carmen de la Vega<sup>1</sup>,  
5 Marta Hernández-García<sup>1,6</sup>, R-GNOSIS WP5 Study Group<sup>7</sup>, Nieves Lopez-Fresneña<sup>3</sup>,  
6 Patricia Ruiz-Garbajosa<sup>1,6</sup>, Rafael Canton<sup>1,6</sup>, Ben S Cooper<sup>4,5</sup> and Alvaro San  
7 Millán<sup>1,2,\*</sup>.

8 <sup>1</sup> *Servicio de Microbiología. Hospital Universitario Ramón y Cajal and Instituto Ramón*  
9 *y Cajal de Investigación Sanitaria. Madrid, Spain.*

10 <sup>2</sup> *Centro de Investigación Biológica en Red. Epidemiología y Salud Pública, Instituto*  
11 *de Salud Carlos III. Madrid. Spain.*

12 <sup>3</sup> *Servicio de Medicina Preventiva y Salud Pública, Hospital Universitario Ramón y*  
13 *Cajal and Instituto Ramón y Cajal de Investigación Sanitaria. Madrid, Spain.*

14 <sup>4</sup> Mahidol-Oxford Tropical Medicine Research Unit, Faculty of Tropical Medicine,  
15 Mahidol University, Bangkok, Thailand.

16 <sup>5</sup> Centre for Tropical Medicine & Global Health, Nuffield Department of Medicine,  
17 University of Oxford, Oxford, United Kingdom.

18 <sup>6</sup> *Red Española de Investigación en Patología Infecciosa. Instituto de Salud Carlos III.*  
19 *Madrid. Spain.*

20 <sup>7</sup> R-GNOSIS WP5 Study Group (in alphabetical order, excluding members present in  
21 the authors list, CDA, NLF, PRG, RC and BSC): Michael Behnke, Hetty Blok, Marc  
22 Bonten, Christian Brun-Buisson, Carolina Fankhauser, Petra Gastmeier, Jennifer  
23 Golembus, Herman Goossens, Sonja Hansen, Stephan Harbarth, Benedikt Huttner,  
24 Fieke Kloosterman, Axel Kola, Andrea Kuperberg, Christine Lammens, Frank Leus,  
25 Friederike Maechler, Surbhi Malhotra, J.J. Schotsman, Frank Schwab, Carlos Triay.

26 <sup>a</sup> These authors contributed equally to this study.

27 \* Correspondence: [alvsanmillan@gmail.com](mailto:alvsanmillan@gmail.com) ORCID: 0000-0001-8544-0387

## 28 **Introductory paragraph**

29 Infections caused by carbapenemase-producing enterobacteria (CPE) are a major  
30 concern in clinical settings worldwide. Two fundamentally different processes shape  
31 the epidemiology of CPE in hospitals: the dissemination of CPE clones from patient to  
32 patient (between-patient transfer), and the transfer of carbapenemase-encoding  
33 plasmids between enterobacteria in the gut microbiota of individual patients (within-  
34 patient transfer). The relative contribution of each process to the overall dissemination  
35 of carbapenem resistance in hospitals remains poorly understood. Here, we used  
36 mechanistic models combining epidemiological data from more than 9,000 patients  
37 with whole genome sequence information from 250 enterobacteria clones to  
38 characterise the dissemination routes of the carbapenemase-encoding plasmid pOXA-  
39 48 in a hospital setting over a two-year period. Our results revealed frequent between-  
40 patient transmission of high-risk pOXA-48-carrying clones, mostly of *Klebsiella*  
41 *pneumoniae* and sporadically *Escherichia coli*. The results also identified pOXA-48  
42 dissemination hotspots within the hospital, such as specific wards and individual rooms  
43 within wards. Using high-resolution plasmid sequence analysis, we uncovered the  
44 pervasive within-patient transfer of pOXA-48, suggesting that horizontal plasmid  
45 transfer occurs in the gut of virtually every colonised patient. The complex and  
46 multifaceted epidemiological scenario exposed by this study provides new insights for  
47 the development of intervention strategies to control the in-hospital spread of CPE.

48

## 49 **Introduction**

50 Antibiotic resistance is one of the most concerning health challenges facing modern  
51 societies<sup>1</sup>. Antibiotic resistance is of particular concern in clinical settings, where  
52 resistant pathogens significantly increase the mortality rates of critically ill patients and  
53 the costs associated with infection management and control<sup>1,2</sup>. The spread of antibiotic  
54 resistance genes between bacteria commonly associated with nosocomial infections  
55 is mainly driven by the horizontal transfer of conjugative plasmids<sup>3,4</sup>. However, the

56 frequency with which this occurs in the clinical settings and its importance for the  
57 dissemination of resistance at a local level remain poorly defined.

58 One of the most clinically relevant groups of nosocomial pathogens are enterobacteria  
59 that produce carbapenemases ( $\beta$ -lactamase enzymes able to degrade carbapenem  
60 antibiotics). Among carbapenemase-producing enterobacteria (CPE), clones of  
61 *Klebsiella pneumoniae* and *Escherichia coli* carrying plasmid-encoded  
62 carbapenemases pose the highest clinical threat<sup>5</sup>. Despite their clinical relevance,  
63 major gaps remain in our understanding of the epidemiology of CPE and of  
64 carbapenemase-encoding plasmids. Previous work has highlighted the importance of  
65 in-hospital CPE transmission from patient to patient<sup>6,7</sup> (between-patient transfer).  
66 However, the dissemination and evolution of CPE in hospitals present an additional  
67 layer of complexity: the transfer of carbapenemase-encoding plasmids between  
68 enterobacteria clones in the gut microbiota of individual patients (within-patient  
69 transfer)<sup>8,9</sup>. Understanding the relative importance of between-patient and within-  
70 patient transfer is of central importance for understanding the epidemiology of CPE  
71 and informing intervention strategies to control the spread of carbapenem resistance  
72 in clinical settings.

73 One of the most frequent carbapenemases in enterobacteria is OXA-48<sup>10</sup>. OXA-48 was  
74 first described in a *K. pneumoniae* strain isolated in Turkey in 2001<sup>11</sup> and is now  
75 distributed worldwide, with particularly high prevalence in North Africa, Middle Eastern  
76 countries, and Europe<sup>10</sup>. The *bla*<sub>OXA-48</sub> gene is usually encoded in an IncL, broad-host-  
77 range conjugative plasmid called pOXA-48<sup>8</sup> (Figure S1). This plasmid is frequently  
78 associated with *K. pneumoniae* high-risk clones<sup>12</sup>, such as the sequence types 11  
79 (ST11), ST15, ST101, and ST405<sup>6,13-15</sup>, which are able to readily spread between  
80 hospitalized patients producing outbreaks of infections<sup>16,17</sup>. Previous epidemiological  
81 studies strongly suggested the possibility of within-patient pOXA-48 transfer<sup>17-21</sup>,

82 indicating that pOXA-48 would be an ideal study system to investigate the nosocomial  
83 dissemination of carbapenem resistance.

84 In the present study, we examined the between-patient and within-patient transfer  
85 dynamics of plasmid pOXA-48 in a tertiary hospital over a two-year period. For our  
86 analysis, we used a large and well-characterized collection of pOXA-48-carrying  
87 enterobacteria generated at the *Hospital Universitario Ramon y Cajal* in Madrid as part  
88 of the European project R-GNOSIS (Resistance of Gram-Negative Organisms:  
89 Studying Intervention Strategies)<sup>22,23</sup>. Using statistical models and combining  
90 epidemiological data from more than 9,000 patients with whole-genome sequence  
91 information from 250 enterobacteria clones, we aimed to define pOXA-48 transfer  
92 dynamics at an unprecedented resolution. Specifically, we aimed to determine the  
93 relative contribution of between-patient and within-patient plasmid transfer in the  
94 epidemiology of pOXA-48, and to use these data to inform improved intervention  
95 strategies to control the spread of carbapenem resistance in hospitals.

96

## 97 **Results**

### 98 *Patients colonised by pOXA-48-carrying enterobacteria in the hospital*

99 During the R-GNOSIS project, hospitalised patients were periodically sampled to  
100 detect the presence of enterobacteria producing extended spectrum  $\beta$ -lactamases  
101 (ESBL) and carbapenemases in their gut microbiota (see methods). The study enrolled  
102 all patients admitted to two medical wards (gastroenterology and pneumology) and two  
103 surgical wards (neurosurgery and urology) in the hospital. The full details of the R-  
104 GNOSIS study in our hospital, including the study population and CPE  
105 characterization, have been previously reported by Hernandez-Garcia *et al*<sup>18,23</sup>. Briefly,  
106 from March 2014 to March 2016, 28,089 rectal swabs were collected from 9,275  
107 patients, and 171 pOXA-48-carrying enterobacteria strains were isolated and  
108 characterised from 105 patients (Figure 1, Table S1). The proportion of patients who

109 were found to be colonized with pOXA-48-carrying enterobacteria on at least one  
 110 occasion during their hospital admission was 0.5% in urology (18/3,483), 1.3% in  
 111 gastroenterology (33/2,591), and 1.5% both in neurosurgery (16/1,068) and  
 112 pneumology (38/2,559), with the medical wards accounting for 68% of colonised  
 113 patients (71/105, Figure 1A-C).

114 In line with previous reports<sup>10</sup>, *K. pneumoniae* was the most frequent pOXA-48-  
 115 carrying species (n= 108). However, pOXA-48 was detected in an additional 7  
 116 enterobacterial species, with *E. coli* being the second most frequent carrier (n= 45,  
 117 Figure 1D, Table S1). In several pOXA-48 carrying patients (18/105), there was co-  
 118 colonisation of the gut microbiota with more than one species carrying the plasmid,  
 119 suggestive of within-patient plasmid transfer events (Figure 1C).

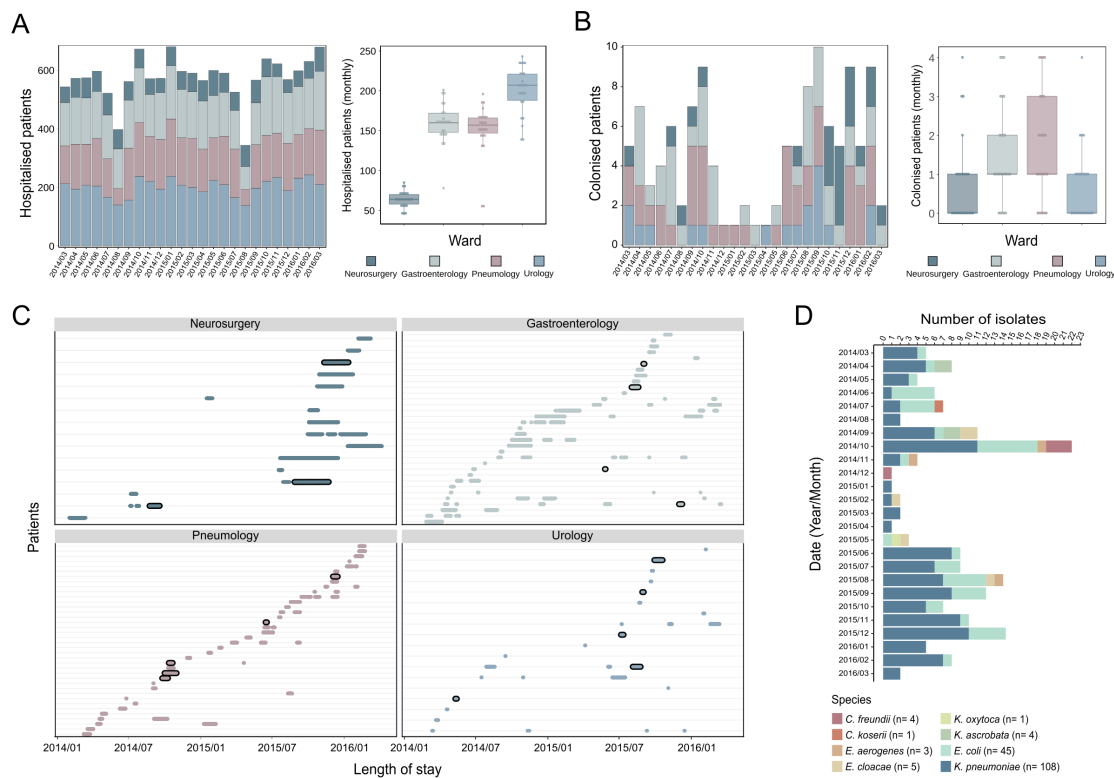

120

121 Figure 1. Study population, colonised patients, and pOXA-48-carrying enterobacteria.  
 122 (A) Patients sampled during the R-GNOSIS study. The left panel shows the number of  
 123 hospitalised patients in each ward over the 25-month study period. The right panel  
 124 shows the distribution of hospitalised patients per ward by month as a boxplot.

125 Horizontal lines inside boxes indicate median values, the upper and lower hinges  
126 correspond to the 25th and 75th percentiles, and whiskers extend to observations  
127 within 1.5 times the interquartile range. (B) Patients colonised by a pOXA-48-carrying  
128 enterobacteria during the study. The left panel represents the number of colonised  
129 patients in each ward over the 25-month study period. The right panel shows the  
130 distribution of colonised patients per ward by month as a boxplot. (C) Distribution of  
131 patients colonised by pOXA-48-carrying enterobacteria in the four wards under study  
132 over the 25-month study period. Each row represents a patient, and the colour  
133 segments represent the length of hospital stay (from admission to discharge). Black  
134 outlining of colour segments indicates patient co-colonisation with more than one  
135 pOXA-48-carrying species. (D) Enterobacteria isolates carrying pOXA-48 recovered  
136 from the patients during the 25 months of the study. The species of the pOXA-48-  
137 carrying isolates are colour-coded as indicated in the legend.

---

138 *Using epidemiological data to analyse pOXA-48 transfer dynamics.*

139 To investigate how pOXA-48 spread in the hospital, we analysed the epidemiological  
140 data using a previously described model which enabled us to estimate the daily  
141 probability of a patient acquiring pOXA-48-carrying enterobacteria and quantify the  
142 effect of covariates on this probability (see methods and Supplementary Table 2)<sup>24</sup>.  
143 We performed this analysis independently for the two species with a large number of  
144 isolates, *K. pneumoniae* and *E. coli*, and we included two covariates in the model. The  
145 first covariate was the number of other patients colonized by pOXA48-carrying  
146 enterobacteria in the ward on the same day, which we expect to be positively  
147 associated with the daily risk of acquisition if between-patient bacterial transfer is  
148 important. The second covariate was known pre-existing intestinal colonisation of the  
149 patient by a pOXA48-carrying enterobacteria of a different species (*K. pneumoniae* or  
150 *E. coli*). If within-patient plasmid transfer is important (from *K. pneumoniae* to *E. coli*  
151 and *vice versa*, Figure 2), then we would expect this to also be positively associated

152 with the daily risk of a patient acquiring pOXA-48-carrying enterobacteria. We  
153 considered different transmission models including and excluding these covariates and  
154 performed model comparisons using the widely applicable information criterion (WAIC,  
155 Supplementary Table 2). The model that best fitted our data was the one including  
156 both covariates and permitting the transmission parameter  $\beta$  to vary by ward (see  
157 Supplementary Table 3 for daily probability values and methods for details).

158 The baseline daily probabilities for becoming colonised with pOXA-48-carrying *K.*  
159 *pneumoniae* or *E. coli* were 0.1% (95% credible interval [CrI] 0.08%, 0.12%) and 0.04%  
160 (95% CrI, 0.02%, 0.05%), respectively (Supplementary Table 3). Results showed that  
161 the probability of acquisition of a pOXA-48-carrying *K. pneumoniae* was higher if other  
162 patients were already colonised with a pOXA-48-carrying clone in the wards of  
163 neurosurgery (Odds ratio [OR] 6.7, 95% CrI 2.5, 11.7) and pneumology (OR 2.7, 95%  
164 CrI 1.2, 4.6). In the wards of gastroenterology (OR 1.7, 95% CrI 0.4, 4.1) and urology  
165 (OR 0.6, 95% CrI 0.01, 4.4) there were no clear effects. In contrast, the presence of  
166 other patients colonised by pOXA-48-carrying clones was not associated with the  
167 probability of acquiring a pOXA-48-carrying *E. coli* in the wards of neurosurgery (OR  
168 0.23, 95% CrI 0.001, 2.0) or urology (OR 0.4, 95% CrI 0.002, 2.7), and there was only  
169 weak evidence for a positive association in the wards of gastroenterology (OR 1.9,  
170 95% CrI 0.4, 4.7) and pneumology (OR 2.6, 95% CrI 0.9, 4.5) (Figure 2A). This result  
171 suggested that *K. pneumoniae* is more important for between-patient transfer than *E.*  
172 *coli*.

173 The model also showed that prior colonisation with a pOXA-48-carrying clone of a  
174 different species was associated with a dramatic increase in the probability of acquiring  
175 a second pOXA48-carrying species (Figure 2A,C). This risk was high both when a  
176 patient was first colonised by *K. pneumoniae* (OR 23.3, 95% CrI 8.3, 53.4) and when  
177 initially colonized with *E. coli* (OR 15.8, 95% CrI 3.8, 42.7). This result underlines the  
178 potential importance of within-patient plasmid transfer in the dissemination of pOXA-48,

179 a role supported by the high frequency of co-colonised patients (Figure 2C). However,  
 180 other explanations may be responsible for this observation, such as independent  
 181 colonisation events of predisposed patients by different pOXA-48-carrying clones.

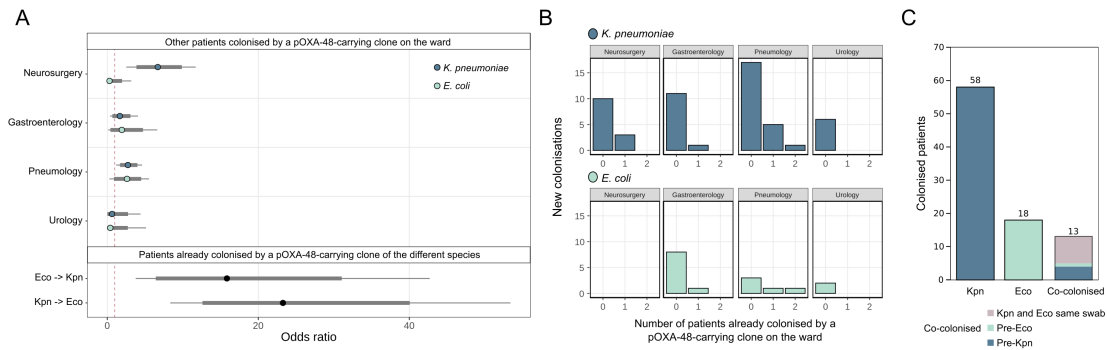

182

183 Figure 2. Acquisition of pOXA-48-carrying enterobacteria by hospitalised patients. (A)  
 184 Posterior distribution of odds ratio for the daily risk of colonisation with a pOXA-48-  
 185 carrying *K. pneumoniae* or *E. coli*. Two covariates were included. The first is the  
 186 presence of other patients colonised by a pOXA-48-carrying clone on the ward, (upper  
 187 part, stratified by ward). If between-patient transfer of the plasmid is important, we  
 188 expect to see a positive association (odds ratio >1) with the daily probability of  
 189 acquiring a pOXA-48 clone. Second, pre-existing colonisation with a pOXA-48 clone  
 190 of a different species (lower part). This covariate measures how being previously  
 191 colonised by a pOXA-48-carrying *E. coli* is associated with the daily probability of  
 192 becoming colonized with a pOXA-48-carrying *K. pneumoniae* clone (Eco → Kpn) and  
 193 *vice versa* (Kpn → Eco). We expect to see a positive association if within-patient  
 194 transfer of pOXA-48 between different bacterial clones is important. Points represent  
 195 posterior medians; thick grey lines represent the 80% CrI and thinner black lines  
 196 represent the 95% CrI. (B) Number of previously uncolonised patients becoming  
 197 colonised by a pOXA-48-carrying *K. pneumoniae* (top row) or *E. coli* (bottom row) as  
 198 a function of the number of patients on the ward already colonised by a pOXA-48-  
 199 carrying clone. (C) Number of R-GNOSIS study patients colonised by pOXA-48-  
 200 carrying *K. pneumoniae* (Kpn) or *E. coli* (Eco) clones or both (co-colonised). For co-  
 201 colonised patients, the colour code indicates whether *K. pneumoniae* or *E. coli* were



202 isolated first or whether both species were simultaneously isolated from the same  
203 swab.

---

204 *Genomic analysis of pOXA-48-carrying enterobacteria*

205 A key limitation of our epidemiological model is that it is based solely on species  
206 identification, which restricts the possibility of reconstructing the spread of specific  
207 clones and plasmids. To track within-patient and between-patient plasmid transfer at  
208 a higher level of resolution, we integrated genomic information by sequencing the  
209 genomes of the 171 pOXA-48-carrying isolates represented in Figure 1D. In line with  
210 previous studies<sup>22,25</sup>, the sequencing results revealed that a small subset of isolates  
211 initially identified as *K. pneumoniae* actually belonged to the species *Klebsiella*  
212 *quasipneumoniae* (n= 2) and *Klebsiella variicola* (n= 3) (Supplementary Figure 2).

213 We analysed the genetic relatedness of isolates belonging to *K. pneumoniae* and to  
214 *E. coli* separately by reconstructing the core genome phylogeny for each species  
215 (Figure 3). For *K. pneumoniae* (n= 103), most of the isolates belonged to a few high-  
216 risk sequence types: ST11 (n= 64), ST307 (n= 17), and ST15 (n= 9). In contrast, *E.*  
217 *coli* (n= 45) showed a more diverse population structure, with only one sequence type,  
218 ST10, comprising more than three isolates (n= 11).

219 We next considered the distribution of the different clonal groups (defined by the  
220 different STs) across colonised patients (Figure 3A,B). Most *K. pneumoniae* isolates  
221 belonged to STs present in more than one patient, whereas approximately half of *E.*  
222 *coli* isolates belonged to STs present in only one patient (Figure 3C). This result,  
223 together with the results of statistical analysis, suggested that a limited number of *K.*  
224 *pneumoniae* high-risk clones are responsible for most of the between-patient transfer  
225 events. However, we observed several cases of pOXA-48-carrying *E. coli* STs  
226 colonising different patients, suggesting that *E. coli* is also responsible for sporadic  
227 between-patient transmission events.

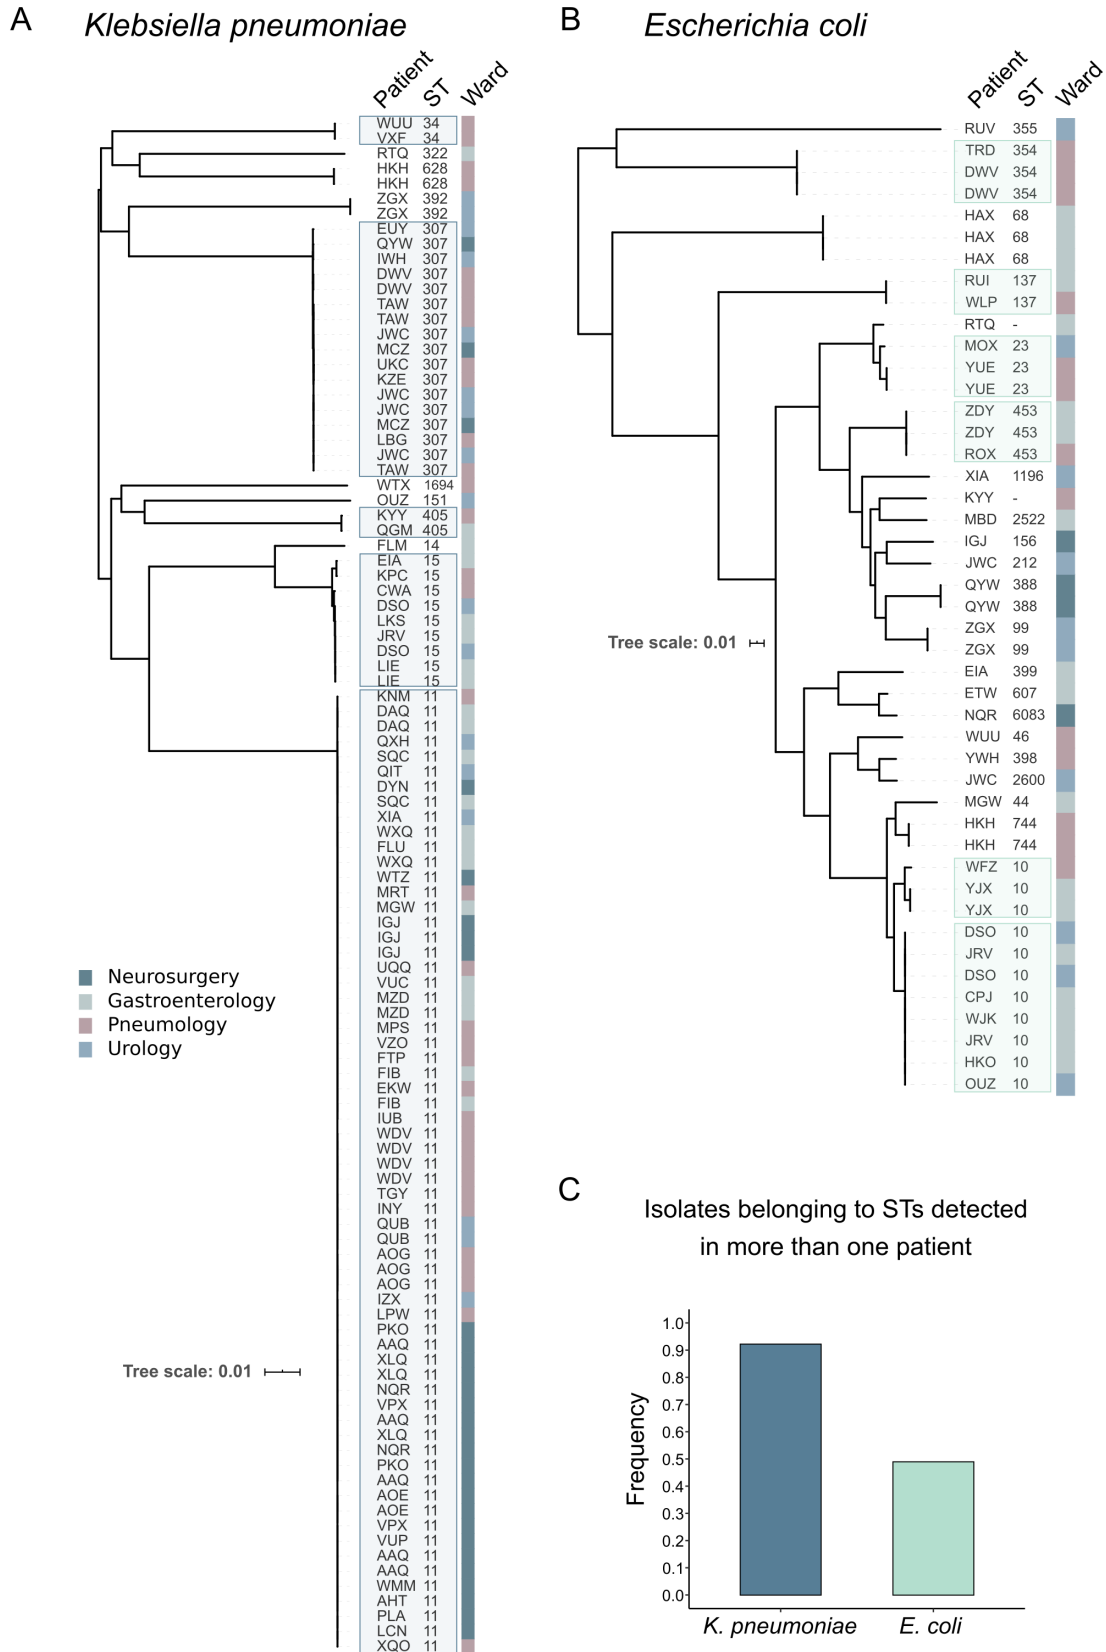

228

229 Figure 3. Phylogenetic analysis of pOXA-48-carrying *K. pneumoniae* and *E. coli*.

230 Genetic relationships among (A) *K. pneumoniae* (n= 103) and (B) *E. coli* (n= 45)

231 isolates carrying pOXA-48 and recovered during the R-GNOSIS study. Tree  
232 construction is based on polymorphisms in the core genome (scale: single nucleotide  
233 polymorphism [SNPs]/site). The columns to the right of the tree indicate patient code,  
234 isolate sequence type (ST), and the ward where the isolate was recovered (colour  
235 code in legend). Boxes with colour shading indicate recovery of isolates of the same  
236 sequence type (ST) from multiple patients in the hospital. (C) Frequency of pOXA-48-  
237 carrying *K. pneumoniae* and *E. coli* isolates belonging to STs detected in multiple  
238 patients.

---

239 *Reconstruction of between-patient transfer dynamics of pOXA-48-carrying clones.*

240 To investigate the specific dissemination routes of pOXA-48-carrying clones, we  
241 integrated epidemiological and genomic data using SCOTTI<sup>26</sup> (see methods). SCOTTI  
242 is a structured coalescent-based tool for reconstructing bacterial transmission, which  
243 accounts for bacterial diversity and evolution within hosts, non-sampled hosts, and  
244 multiple infections of the same host. We analysed the spread of the dominant *K.*  
245 *pneumoniae* and *E. coli* STs within and among the four wards under study (Figure 4,  
246 Supplementary Figures 3-10). As expected from the genomic data (Figure 3A), clones  
247 belonging to *K. pneumoniae* ST11 were responsible for most of the putative between-  
248 patient transmission events. The analysis attributed transmission events of pOXA-48-  
249 carrying ST11 on every single ward and even between wards, with neurosurgery being  
250 the ward with the highest frequency and probability of ST11 transmission (Figure 4),  
251 as suggested by the epidemiological model (Figure 2A). In light of these results, we  
252 investigated *K. pneumoniae* ST11/pOXA-48 epidemiology in the neurosurgery ward in  
253 more detail by looking at the spatiotemporal distribution of colonised patients  
254 (Supplementary Figure 11). The neurosurgery ward includes 11 rooms with 20 beds  
255 (9 double rooms and 2 single rooms). Of the 16 colonized patients, 6 had overlapping  
256 stays in the same room, suggesting that this room acted as a hotspot for *K.*  
257 *pneumoniae* ST11/pOXA-48 colonisation and transmission.

258 SCOTTI also predicted transmission events mediated by three further pOXA-48-  
259 carrying clones. Two transmission events were attributed to *K. pneumoniae* ST307 in  
260 the pneumology ward and three more to *K. pneumoniae* ST15: two in gastroenterology  
261 and another one between the gastroenterology and urology wards. In line with the  
262 genomic results (Figure 3B), SCOTTI also attributed two between-patient transfer  
263 events to *E. coli* ST10, one on the gastroenterology ward and another one between  
264 the gastroenterology and urology wards (Figure 4).

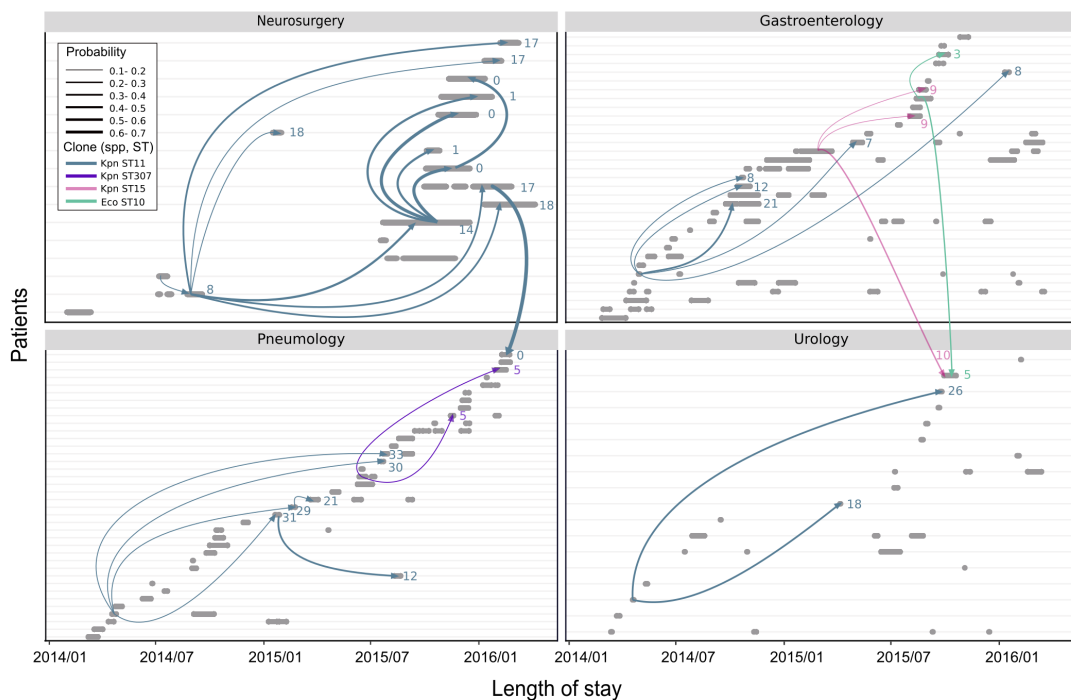

265

266 Figure 4. SCOTTI reconstruction of between-patient transfer of pOXA-48-carrying  
267 enterobacteria. The charts represent SCOTTI-attributed between-patient transfer  
268 events involving pOXA-48-carrying enterobacteria clones in the hospital, with  
269 individual panels representing the distribution of patients colonized by pOXA-48-  
270 carrying enterobacteria on the different wards. Each row represents an individual  
271 patient, and the grey segments represent the length of stay (from admission to  
272 discharge). Coloured arrows represent transmission events predicted by SCOTTI. Line  
273 colour indicates the clone responsible for the transmission event, and line thickness  
274 represents the probability of the SCOTTI-attributed transmission, as indicated in the

275 legend: Kpn, *K. pneumoniae*; Eco, *E. coli*; ST, sequence type. Numbers to the right of  
276 arrowheads indicate the number of SNPs differentiating the complete genomes of the  
277 clone pair involved in the putative transmission event.

---

278 *Genetic analysis of pOXA-48 confirms pervasive within-patient plasmid transfer*

279 Our results suggest that the high frequency of patient colonisation by two plasmid-  
280 carrying species could be due to within-patient pOXA-48 transfer (Figures 1 and 2).  
281 However, although unlikely, another possibility is independent colonisation events  
282 involving different plasmid-carrying clones. To distinguish between these possibilities,  
283 we analysed the genetic sequence of plasmid pOXA-48 across all isolates with the aim  
284 of using specific genetic signatures in the plasmid to provide evidence for or against  
285 within-patient plasmid transfer. To increase the resolution of this analysis, we enriched  
286 the R-GNOSIS collection by recovering and sequencing the complete genomes of all  
287 the pOXA-48-carrying enterobacteria isolated from patients in our hospital since the  
288 plasmid was first reported in 2012 (Supplementary Table 1). In total, we determined  
289 and analysed the complete genomes of 250 strains, combining short-read and long-  
290 read sequencing technologies (see methods and Supplementary Figure 12).

291 The results showed that pOXA-48 is highly conserved (Figure 5A). The core plasmid  
292 sequence spanned more than 60 kb (>90% of plasmid sequence) in 218 of the 250  
293 strains (Supplementary Table 1). Analysis of the core genome among these 218  
294 plasmids revealed an identical sequence in 80% of them. In the remaining 20%, we  
295 detected a total 21 SNPs, with each plasmid presenting 1 or 2 SNPs compared with  
296 the most common variant (Figure 5A). This high degree of plasmid structural and  
297 sequence conservation and the strong link between pOXA-48 and the *bla*<sub>OXA-48</sub> gene  
298 are important differences from previous analyses on the spread of plasmid-mediated  
299 carbapenemases such as KPC<sup>8,9,27</sup>.

300 Given the low plasmid-sequence variability, we could not track plasmid transmission  
301 using the same tools used for bacterial transmission. Instead, we monitored plasmid

302 transfer by using the rare plasmid variants carrying specific core-region SNPs as  
303 genetic fingerprints (Figure 5). We focused on instances where the same traceable  
304 plasmid variant was present in different bacterial clones (belonging to different  
305 species). We considered that isolation of different bacterial species carrying the same  
306 rare plasmid variant from the same patient would be a very strong indicator of within-  
307 patient plasmid transfer. We found four examples in which the same rare plasmid  
308 variant was present in different bacterial species (Figure 5A). In all four, different  
309 species carrying the same plasmid variant were isolated from the same patient (Figure  
310 5B). For example, plasmid variant 3 was detected in 6 bacterial isolates belonging to  
311 four clones (one *K. pneumoniae*, one *E. coli* and two *C. freundii*), and all of them were  
312 recovered from a single patient in the hospital (patient code YUE). Crucially, the  
313 chances of independent patient colonisation with the different bacterial clones carrying  
314 these rare plasmid variants are extremely low (variant 1,  $6.4 \times 10^{-4}$ ; variant 2,  $8.9 \times 10^{-4}$ ;  
315 variant 3,  $1.1 \times 10^{-8}$ ; variant 4,  $2.1 \times 10^{-5}$ ), confirming that these were within-patient  
316 plasmid transfer events.

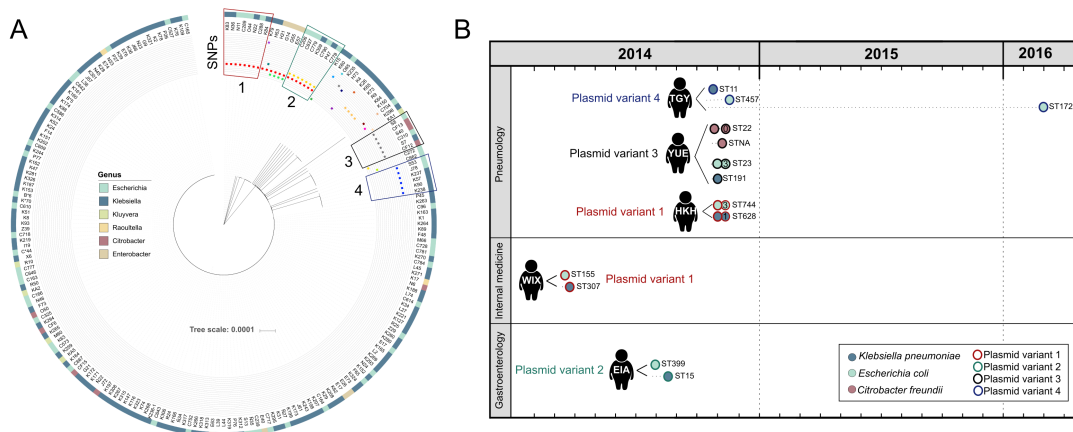

318 Figure 5. Pervasive within-patient pOXA-48 transfer. (A) Dendrogram constructed from  
319 the 21 polymorphisms present in the core region of plasmid pOXA-48. The outermost  
320 circle indicates plasmid-carrying clones genus according to the colour code in the  
321 legend, the second circle indicates the clone names, and the remaining circles indicate  
322 the presence of each plasmid SNP. Coloured boxes indicate the four plasmid variants

323 carrying a 'rare' SNP present in clones of different species and used as genetic  
324 fingerprints. (B) Representation of patients colonized by clones carrying rare  
325 (traceable) plasmid variants. Patients are represented with their corresponding three-  
326 letter patient code. Circles represent clones isolated from the patient, with the fill colour  
327 indicating the bacterial species and the outline colour indicating the plasmid variant  
328 (see legend). The sequence type (ST) of each clone is indicated. Circles in the same  
329 row indicate different isolates of the same clone; the number inside the second circle  
330 indicates the number of SNPs accumulated in the complete genome relative to the first  
331 isolation.

---

332 *High in vitro pOXA-48 conjugation rate*

333 Despite the limitations imposed by the sensitivity and frequency of the sampling  
334 method, the four selected pOXA-48 variants with core-region SNPs demonstrated  
335 pervasive within-patient plasmid transfer. However, the specific SNPs used as genetic  
336 fingerprints might affect the conjugation ability of the plasmid, which would make it  
337 impossible to generalize the results with these variants to the most common pOXA-48  
338 variant. To exclude this possibility, we experimentally tested the conjugation rates of  
339 the most common pOXA-48 variant and the four traceable variants by introducing the  
340 plasmids independently into the *E. coli* strain J53 and determining the conjugation rate  
341 of each variant in this isogenic background (Figure 6, see methods). Although  
342 conjugation rates differed slightly (ANOVA;  $F= 2.9$ ,  $df= 4$ ,  $P= 0.037$ ), they did not differ  
343 significantly between the traceable SNP plasmid variants and the most frequent variant  
344 (Tukey multiple comparisons of means,  $P > 0.3$ ), indicating that all these plasmid  
345 variants have similar within-patient transfer ability. We therefore conclude that  
346 horizontal spread of pOXA-48 in the gut microbiota is the norm in colonized patients.  
347 Interestingly, and as previously reported<sup>28</sup>, the *in vitro* pOXA-48 conjugation rate was  
348 extremely high, with a median frequency of 0.3 transconjugants per donor after only

349 one hour of mating (Supplementary Figure 13). The high pOXA-48 conjugation rate  
350 helps to explain the frequent within-patient plasmid transfer reported here.

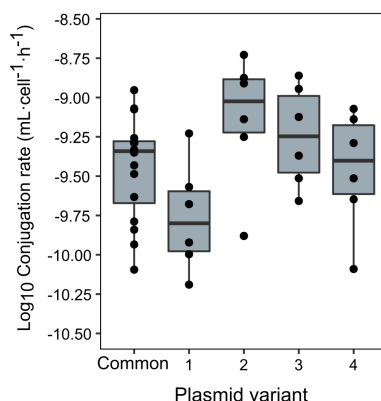

351

352 Figure 6. pOXA-48 conjugation rate. Conjugation rates of the most common pOXA-48  
353 variant in the hospital (common, 12 biological replicates) and the four core-region SNP  
354 variants used to track within-patient plasmid transfer (6 biological replicates). Plasmid  
355 variant numbers correspond to those indicated in Figure 5. Horizontal lines inside  
356 boxes indicate median values, the upper and lower hinges correspond to the 25th and  
357 75th percentiles, and whiskers extend to observations within 1.5 times the interquartile  
358 range.

359

## 360 Discussion

361 CPE are emerging as one of the most concerning threats to public health worldwide<sup>5</sup>.  
362 Recent studies have highlighted the central relevance of hospitals as hotspots for the  
363 dissemination of CPE among patients and for the dissemination of the  
364 carbapenemase-encoding conjugative plasmids between enterobacteria clones<sup>6-8</sup>. In  
365 this study, we performed a high-resolution epidemiological analysis to uncover the  
366 dissemination routes of the carbapenemase-encoding plasmid pOXA-48 (both at the  
367 bacterial and plasmid levels). By integrating epidemiological and genomic data, we  
368 uncovered frequent between-patient bacterial transfer and pervasive within-patient  
369 plasmid transfer.



370 In light of our results, we propose that in-hospital pOXA-48 dissemination generally  
371 adheres to the following dynamics: high-risk pOXA-48-carrying enterobacteria clones,  
372 mainly *K. pneumoniae* ST11, spread among hospitalised patients, colonising their gut  
373 microbiota (Figures 2, 3 and 4). Once patients are colonised, the plasmid readily  
374 spreads through conjugation towards other resident members of the gut microbiota  
375 (enterobacteria such as *E. coli*, *C. freundii*, and *E. cloacae*, Figures 1 and 5). The  
376 plasmid's high conjugation rate increases its chances of becoming established in the  
377 gut microbiota because, even if the invading nosocomial clone is eliminated, pOXA-48  
378 can survive in a different bacterial host. Moreover, the frequent plasmid transfer  
379 provides a test bench for new bacterium-plasmid combinations, some of which may be  
380 particularly successful associations able to persist and even disseminate towards new  
381 human hosts<sup>4</sup>. An illustrative example of these general dynamics is the case of the  
382 patient carrying plasmid variant 4 (Figure 5B; patient code TGY). This patient was first  
383 colonised by *K. pneumoniae* ST11/pOXA-48 in October 2014, and 11 days later a  
384 pOXA-48-carrying *E. coli* strain was isolated from the same patient (ST457). During a  
385 new admission 17 months later, a different pOXA-48-carrying *E. coli* (ST1722) was  
386 recovered from the patient's gut microbiota. The pOXA-48 variant in all the clones carries a  
387 traceable SNP, confirming that the patient was colonized throughout the period by a  
388 pOXA-48-carrying enterobacteria, even though the plasmid had moved from its original  
389 *K. pneumoniae* ST11 host to *E. coli* clones in the gut microbiota.

390 Another interesting observation emerging from this study is that most of the events  
391 attributed to between-patient transmission originated from a small subset of patients  
392 (Figure 4). This result highlights the potential role of super-spreader patients in the  
393 nosocomial dissemination of CPE<sup>29</sup>. Unfortunately, given the small number of super-  
394 spreader patients, we were not able to associate them to any particular epidemiological  
395 aspect, such as age or length of stay.

396 An important goal of this study is to inform new and improved intervention strategies  
397 aimed at controlling the spread of carbapenem resistance in hospitals. Our results can  
398 help in the design of interventions to control OXA-48 dissemination at two levels:

399 (i) *Between-patient*. We have shown that the spread of pOXA-48-carrying  
400 enterobacteria between patients in the hospital is mainly mediated by high-risk clones  
401 commonly associated with nosocomial infections. These clones reside in hospital  
402 settings and are able to survive in the environment, creating stable reservoirs (often  
403 involving sinks<sup>30-32</sup>). Moreover, our results also showed that there are specific  
404 colonisation and transmission hotspots, such as individual rooms within wards  
405 (Supplementary Figure 11). We therefore propose that measures to detect and control  
406 environmental reservoirs and transfer hotspots could prevent between-patient OXA-  
407 48 dissemination. Such measures could represent a useful addition to the strategies  
408 based on patient surveillance and standard precautions already applied in hospitals,  
409 and could complement and improve the outcome of contact isolation measures<sup>22</sup>.

410 (ii) *Within-patient*. A key finding of our study is the high prevalence of within-patient  
411 pOXA-48 transfer, which in turn helps to establish long-term pOXA-48 gut carriers.  
412 Preventing within-patient plasmid transfer and gut carriage is thus a particularly  
413 promising strategy for containing carbapenem resistance. This goal could be achieved  
414 either by blocking plasmid conjugation<sup>33</sup> or, ideally, by specifically clearing pOXA-48  
415 from the gut microbiota of patients by targeted decontamination. Decontamination  
416 strategies would aim to remove pOXA-48 plasmid or pOXA-48-carrying enterobacteria  
417 from carriers while preserving the integrity of the gut microbiota. New biotechnological  
418 advances are being made on this front. For example, CRISPR (clustered regularly  
419 interspaced short palindromic repeats) based technology can be used for targeted  
420 plasmid elimination<sup>34</sup>, and the new toxin–intein antimicrobials could be engineered to  
421 selectively remove pOXA-48-carrying clones from the microbiota<sup>35</sup>. Further work is

422 urgently needed to tailor these emerging technologies into effective intervention  
423 strategies against the threat of plasmid-mediated carbapenemases.

424

## 425 **Methods**

### 426 *Study design and data collection*

427 We studied samples collected from patients admitted in a Spanish university hospital  
428 from March 4th, 2014, to March 31<sup>st</sup>, 2016, as part of an active surveillance-screening  
429 program for detecting ESBL/carbapenemase-carriers (R-GNOSIS-FP7-HEALTH-F3-  
430 2011-282512, [www.r-gnosis.eu/](http://www.r-gnosis.eu/))<sup>18,22,23,36</sup>. This study was approved by the Ramón y  
431 Cajal University Hospital Ethics Committee (Reference 251/13), which waived the  
432 need for informed consent from patients on the basis that the study was assessing  
433 ward-level effects and it was of minimal risk. This screening included a total of 28,089  
434 samples from 9,275 patients admitted at 4 different wards (gastroenterology,  
435 neurosurgery, pneumology and urology) in the Ramon y Cajal University Hospital  
436 (Madrid, Spain). We used a randomly generated three-letters code for patient  
437 anonymization. Rectal samples were obtained from patients within 72 h of ward  
438 admission; weekly additional samples were recovered in patients hospitalised  $\geq 7$  days,  
439 and a final sample at discharge was obtained in those patients with a hospital stay  $\geq 3$   
440 days (swabbing interval: gastroenterology, median 2 days, IQR 1, 6 days; neurosurgery,  
441 median 3 days, IQR 1, 7 days; pneumology, median 2 days, IQR 1, 6 days; urology,  
442 median 1 day, IQR 1, 3 days). This protocol allowed us to obtain a time sequence for  
443 each patient in the hospital.

444 In this paper we have focused on the subset of patients colonised by pOXA-48-carrying  
445 enterobacteria within the R-GNOSIS project. Prevalence of colonisation by OXA-48-  
446 carrying enterobacteria among patients from 2014 to 2016 was 1.13% (105/9,275  
447 patients). pOXA-48-carrying enterobacteria were the most frequent CPE in the hospital  
448 in this period, with 171 positive isolates (Supplementary Table 1). To better

449 characterise pOXA-48 diversity and dissemination, we included in the within-patient  
450 pOXA-48 transfer analysis all the pOXA-48-carrying enterobacteria isolated from  
451 patients in our hospital since it was first reported in 2012. Specifically, we included 79  
452 additional pOXA-48 carrying enterobacteria not included in the R-GNOSIS project  
453 (Supplementary Table 1).

#### 454 *Bacterial characterisation*

455 Samples were initially characterised as previously described, following the RGNOSIS  
456 protocol<sup>23</sup>. Briefly, swabs were plated on Chromo ID-ESBL and Chrom-CARB/OXA-48  
457 selective agar media (BioMérieux, France) and bacterial colonies able to grow on these  
458 media were identified by MALDI-TOF MS (Bruker Daltonics, Germany). OXA-48  
459 production was confirmed with KPC/MBL/OXA-48 Confirm Kit test (Rosco Diagnostica,  
460 Denmark). The MicroScan automated system (Beckman Coulter, CA, USA) was used  
461 for the antimicrobial susceptibility testing and the results were interpreted according to  
462 EUCAST guidelines (EUCAST breakpoint v7.1, [www.eucast.org](http://www.eucast.org)). Furthermore,  
463 specific *bla*<sub>OXA-48</sub> resistance gene was identified by multiplex PCR<sup>37</sup>, and the PCR  
464 products were sequenced and compared with the GenBank database.

#### 465 *Bacterial culture, DNA extraction, Illumina sequencing and PacBio sequencing*

466 All pOXA-48-carrying enterobacteria isolates (n=250) were grown in Lysogeny broth  
467 (LB) medium at 37°C. Genomic DNA of all the strains was isolated using the Wizard  
468 genomic DNA purification kit (Promega, Madison, WI, USA), following manufacturer's  
469 instructions. Whole genome sequencing was conducted at the Wellcome Trust Centre  
470 for Human Genetics (Oxford, UK), using the Illumina HiSeq4000 platform with 125  
471 base pair (bp) paired-end reads. Furthermore, 2 isolates and 5 specific pOXA-48  
472 plasmids (*K. pneumoniae* isolates k8 and k165, and plasmids from *K. pneumoniae*  
473 isolates k2, k164, k187, k236-1 and k273) were sequenced using the PacBio platform  
474 (The Norwegian Sequencing Centre; PacBio RSII platform using P5-C3 chemistry).

#### 475 *Assembling and quality control (QC) analysis of sequence data*

476 Trimmomatic v0.33<sup>38</sup> was used to trim the Illumina sequence reads. SPAdes v3.9.0<sup>39</sup>  
477 was used to generate *de novo* assemblies from the trimmed sequence reads with the  
478 `–cov-cutoff` flag set to ‘auto’. QUAST v4.6.0<sup>40</sup> was used to generate assembly statistics.  
479 All the *de novo* assemblies reached enough quality including total size of 5–7Mb, the  
480 total number of contigs over 1 kb was lower than 200 and more than 90% of the  
481 assembly comprised contigs greater than 1 kb. Prokka v1.5<sup>41</sup> was used to annotate  
482 the *de novo* assemblies with predicted genes.

#### 483 *Phylogenetic analysis and identification of STs and clustering*

484 Mash v2.0<sup>42</sup> was used to determine distances between genomes using the raw  
485 sequence reads, and a phylogeny was constructed with mashtree v0.33<sup>43</sup>. For the  
486 analysis of the core genome (the set of homologous nucleotides present in all the  
487 isolates when mapped against the same reference) and the core sequence of the  
488 pOXA-48 plasmid, an alignment of the single nucleotide polymorphisms (SNPs)  
489 obtained with Snippy v2.5 (<https://github.com/tseemann/snippy>) was used to infer a  
490 phylogeny. A maximum-likelihood tree was generated using IQ-TREE with the feature  
491 of automated detection of the best evolutionary model<sup>44</sup>. All trees were visualised using  
492 the iTOL tool<sup>45</sup>. Recombination regions were identified with Gubbins<sup>46</sup>.

493 The seven-gene ST of all the isolates was determined using the multilocus sequence  
494 typing (MLST) tool (<https://github.com/tseemann/mlst>).

#### 495 *Transmission mathematical modelling*

496 Our statistical model was designed based on the premises established by Crellen T, *et*  
497 *al*<sup>24</sup>. The objective of our model is to estimate the daily probability of acquisition of a  
498 new pOXA-48-carrying enterobacteria by a patient in the hospital. Acquisition can  
499 occur through pOXA-48-carrying bacteria acquisition (between-patient transfer), or  
500 through pOXA-48 conjugation in the gut microbiota of the patient toward a new  
501 enterobacteria host (within-patient transfer).

502 We tracked all the pOXA-48-carrying enterobacteria identified in the hospital during  
503 the R-GNOSIS study period (Figure 1). This allows us to estimate and compare the  
504 acquisition of the most prevalent species, *K. pneumoniae* and *E. coli* independently.  
505 Each day in the ward, a patient can become colonised by a new pOXA-48-carrying *K.*  
506 *pneumoniae* or *E. coli*. However, as we lacked swabbing results from each day, the  
507 timing of new colonisation events with a pOXA-48-carrying clone are interval censored,  
508 and the analysis needs to account for this interval censoring<sup>24</sup>. If the probability of  
509 becoming colonised on day *i* for patient *j* is  $p_{ij}$ , the probability of remaining uncolonized  
510 is  $(1-p_{ij})$ . Therefore, in interval *k* for patient *j* consisting of  $N_{kj}$  days, the probability of  
511 remaining uncolonized is:

$$\prod_{i=1}^{N_{kj}} (1 - p_{ij})$$

512  
513 And the probability of becoming colonised ( $v_{kj}$ ) is the complement:

$$v_{kj} = 1 - \prod_{i=1}^{N_{kj}} (1 - p_{ij})$$

514  
515 The outcome for patient *j* in interval *k* ( $X_{kj}$ ), is either that the patient acquired a new  
516 pOXA-48-carrying enterobacteria ( $X_{kj} = 1$ ) or did not ( $X_{kj} = 0$ ). The likelihood is given by:

$$517 X_{kj} \sim \text{Bernoulli}(v_{kj})$$

518 The daily probability of becoming colonised ( $p_{ij}$ ) is related by the logit link function to a  
519 linear function of covariates ( $\pi_{ij}$ ):

$$520 \pi_{ij} = \alpha + \beta_1 x_1 + \beta_2 x_2 + \beta_3 x_3 \dots$$

$$521 p_{ij} = \exp(\pi_{ij}) / (\exp(\pi_{ij}) + 1)$$

522 Where *x* represents a vector of predictors (data) and  $\beta$  is a vector of slopes  
523 (parameters) that are to be estimated. The  $\beta$  coefficient can be a single parameter, or  
524 permitted to vary by ward. The range of values and the prior distributions of the different  
525 parameters are described in Supplementary Table 2.

526 We developed and fitted models to study the probability of acquisition of pOXA-48-  
527 carrying *K. pneumoniae* and, separately, *E. coli*. We included the probability of *K.*  
528 *pneumoniae* and *E. coli* transferring the plasmid towards each other in the gut  
529 microbiota of colonised patients. To that end, we introduced as covariates the number  
530 of other patients already colonised by a pOXA-48-carrying enterobacteria each day, to  
531 study the risk of between-patient transfer ( $\beta$  coefficient), and if a patient was previously  
532 colonised with pOXA-48-carrying *E. coli* or *K. pneumoniae*, to study within patient  
533 pOXA-48-transmission ( $\gamma$  coefficient).

534 We considered five different transmission models to assess transmission of pOXA-48-  
535 carrying *K. pneumoniae* and *E. coli*:

536 1) Where the daily risk of acquiring pOXA-48-carrying *K. pneumoniae* and *E. coli*  
537 is constant (intercept only).

538 2) A constant term plus a between-patient transmission parameter  $\beta$ , where the  
539 explanatory variable ( $n_i$ ) is the number of patients colonised by pOXA-48  
540 enterobacteria in the four wards.

541 3) As (2) but permitting the transmission parameter  $\beta$  to vary by ward ( $\beta_w$ ) and  
542 considering the number of patients colonised by a pOXA-48 enterobacteria in each  
543 ward ( $n_{wi}$ ).

544 4) As (2) but including a  $\gamma$  parameter for the within-patient transmission, and an  
545 explanatory variable ( $x_i$ ), which indicates if a patient had been previously colonised by  
546 a pOXA-48-carrying enterobacteria from a different species (yes,  $x_i = 1$ ; no,  $x_i = 0$ ).

547 5) As model (4) but permitting the transmission parameter  $\beta$  to vary by ward ( $\beta_w$ )  
548 and considering the number of patients colonised by a pOXA-48 enterobacteria in each  
549 ward ( $n_{wi}$ ).

550 The probability of colonisation for individual  $j$  on day  $i$  for the respective models is  
551 calculated from:

552 Transmission Model 1:  $\text{logit}(p_{ij}) = \alpha$

553 Transmission Model 2:  $\text{logit}(p_{ij}) = \alpha + \beta n_i$

554 Transmission Model 3:  $\text{logit}(p_{ij}) = \alpha + \beta_w n_{wi}$

555 Transmission Model 4:  $\text{logit}(p_{ij}) = \alpha + \beta n_i + \gamma x_i$

556 Transmission Model 5:  $\text{logit}(p_{ij}) = \alpha + \beta_w n_{wi} + \gamma x_i$

557 We fitted the statistical models using Hamiltonian Markov chain Monte Carlo in Stan  
558 (version 2.17.3) within the R environment (v. 3.4.3). Prior distributions were normal  
559 distributions using weakly informative priors<sup>24</sup>. Model comparison was performed with  
560 widely applicable information criterion (WAIC, Supplementary Table 2). The model that  
561 best fits our data is model number 5. We use 95% credible intervals (CrIs) to  
562 summarise uncertainty in posterior distributions. Daily probabilities calculated with  
563 model 5 are presented in Supplementary Table 3.

#### 564 *Identification of transmission routes among patients*

565 We applied SCOTTI<sup>26</sup>, a structured coalescent-based tool for reconstructing  
566 transmission, to the dominant *K. pneumoniae* and *E. coli* STs (with more than four  
567 isolates: *K. pneumoniae* ST11, ST15, ST307 and *E. coli* ST10), combining  
568 epidemiological and genomic data. We used the genome alignment, avoiding the  
569 recombination regions after the gubbins analysis<sup>46</sup>, as input to SCOTTI, together with  
570 the first date when an isolate was detected in a patient, and the start and end date of  
571 each patient's infection risk period (Supplementary Table 1). Due to the possibility of  
572 transmission events between wards, we established a hierarchical analysis. First, we  
573 applied SCOTTI to the patients/genomes included in each ward to identify  
574 transmission routes within each ward, and second, we analysed the data of the 4 wards  
575 combined to identify additional transmission events between wards (Supplementary  
576 Figures 3-10).

#### 577 *Identification of within-patient transmission routes of specific plasmid variants*

578 In order to confirm within-patient plasmid transfer we studied specific pOXA-48 variants  
579 across the different isolates. The sequences belonging to pOXA-48 plasmid were



580 mapped using the complete sequence of one of the plasmid sequenced by PacBio as  
581 reference (from *K. pneumoniae* k8), and the different variants and SNPs were identified  
582 using Snippy v2.5 (<https://github.com/tseemann/snippy>). We first analysed the degree  
583 of genetic variation in the plasmid among all the 250 bacterial clones. We compared  
584 the pOXA-48 variants sharing a core region of at least 60 kb (>90 % of the whole  
585 sequence, n= 218, Supplementary Table 1). We investigated cases where a variant of  
586 the plasmid carrying a “rare” traceable SNP is present in different clones (from different  
587 species). We found four plasmid variants present in different bacterial species and, in  
588 all cases, different species carrying the same plasmid variant were isolated from the  
589 same patient (Figure 5B). For those patients, we estimated the probability of those  
590 strains being acquired by independent subsequent transmissions events, assuming a  
591 random distribution of plasmid-carrying strains across patients. Analyses were  
592 performed using R (Version 3.4.2) ([www.R-project.org](http://www.R-project.org)).

### 593 *Conjugation assays*

594 An initial conjugation round was performed to introduce pOXA-48 plasmids variants  
595 into *E. coli* J53<sup>47</sup> (a sodium azide resistant laboratory mutant of *E. coli* K-12). pOXA-  
596 48-carrying wild type strains (donors) and *E. coli* J53 (recipient) were streaked from  
597 freezer stocks onto solid LB agar medium with selective pressure (ertapenem 0.5  
598 µg/ml and sodium azide 100 µg/ml, respectively) and incubated overnight at 37°C.  
599 Three donor colonies and one recipient colony were independently inoculated in 2 ml  
600 of LB in 15-ml culture tubes and incubated for 1.5 h at 37°C and 225 rpm. After growth,  
601 donor and recipient cultures were collected by centrifugation (15 min, 1500 g) and cells  
602 were re-suspended in each tube with 300 µl of sterile NaCl 0.9%. Then, the  
603 suspensions were mixed in a 1:1 proportion, spotted onto solid LB medium and  
604 incubated at 37°C for 1.5 hours. Transconjugants were selected by streaking the  
605 conjugation mix on LB with ertapenem (0.5 µg/ml) and sodium azide (100 µg/ml). The  
606 transconjugants were verified by *bla*<sub>OXA-48</sub> gene amplification by PCR as previously

607 described<sup>11</sup>. For the isogenic conjugation experiments, the five different *E. coli* J53  
608 carrying pOXA-48 plasmid variants acted as independent donors, and a  
609 chloramphenicol resistant version of J53 developed in our lab was used as the  
610 recipient strain. 6 colonies of each donor and recipient strains were independently  
611 inoculated in 2 ml of LB in 15-ml culture tubes and incubated overnight at 37 °C and  
612 225 rpm. Each culture was used next day to inoculate 5 ml of LB in 50-ml culture tubes  
613 (1:100 dilution). After 1 hour of incubation at 37°C and 225 r.p.m, the pellets were  
614 collected by centrifugation (15 min, 1500 g) and cells were re-suspended in each tube  
615 with 300 µl of sterile NaCl 0.9%. Donor and recipient suspensions were mixed in a 1:1  
616 proportion and plated on a sterile nitrocellulose filter (0.45 µm) on LB agar medium and  
617 incubated at 37°C for 1 hour. Simultaneously, each culture was plated on selecting  
618 agar for donors, recipient and transconjugants as controls (carbenicillin 100 µg/ml,  
619 chloramphenicol 50 µg/ml and a combination of both respectively). After 1 hour of  
620 incubation at 37°C, the filter contents were re-suspended in 2 ml of sterile NaCl 0.9%,  
621 diluted and plated on selective agar for donors, recipient and transconjugants.  
622 Transconjugants were verified by PCR as described above. Conjugation rates were  
623 determined using the end-point method<sup>48,49</sup> (Figure 6), and the frequencies of  
624 transconjugants per donor were calculated from the same data (Supplementary Figure  
625 13).

626

## 627 **References**

628

- 629 1 O'Neill, J. TACKLING DRUG-RESISTANT INFECTIONS GLOBALLY: FINAL  
630 REPORT AND RECOMMENDATIONS. *Review on Antimicrobial Resistance* (2016).
- 631 2 Vincent, J. L. *et al.* International study of the prevalence and outcomes of infection in  
632 intensive care units. *JAMA* **302**, 2323-2329, doi:10.1001/jama.2009.1754 (2009).
- 633 3 Partridge, S. R., Kwong, S. M., Firth, N. & Jensen, S. O. Mobile Genetic Elements  
634 Associated with Antimicrobial Resistance. *Clin Microbiol Rev* **31**,  
635 doi:10.1128/CMR.00088-17 (2018).
- 636 4 San Millan, A. Evolution of Plasmid-Mediated Antibiotic Resistance in the Clinical  
637 Context. *Trends Microbiol*, doi:10.1016/j.tim.2018.06.007 (2018).

- 638 5 Bonomo, R. A. *et al.* Carbapenemase-Producing Organisms: A Global Scourge. *Clin Infect Dis* **66**, 1290-1297, doi:10.1093/cid/cix893 (2018).  
639
- 640 6 David, S. *et al.* Epidemic of carbapenem-resistant *Klebsiella pneumoniae* in Europe is  
641 driven by nosocomial spread. *Nat Microbiol*, doi:10.1038/s41564-019-0492-8 (2019).
- 642 7 Snitkin, E. S. *et al.* Tracking a hospital outbreak of carbapenem-resistant *Klebsiella*  
643 *pneumoniae* with whole-genome sequencing. *Sci Transl Med* **4**, 148ra116,  
644 doi:10.1126/scitranslmed.3004129 (2012).
- 645 8 Conlan, S. *et al.* Single-molecule sequencing to track plasmid diversity of hospital-  
646 associated carbapenemase-producing Enterobacteriaceae. *Sci Transl Med* **6**,  
647 254ra126, doi:10.1126/scitranslmed.3009845 (2014).
- 648 9 Sheppard, A. E. *et al.* Nested Russian Doll-Like Genetic Mobility Drives Rapid  
649 Dissemination of the Carbapenem Resistance Gene blaKPC. *Antimicrob Agents*  
650 *Chemother* **60**, 3767-3778, doi:10.1128/AAC.00464-16 (2016).
- 651 10 Pitout, J. D. D., Peirano, G., Kock, M. M., Strydom, K. A. & Matsumura, Y. The Global  
652 Ascendency of OXA-48-Type Carbapenemases. *Clin Microbiol Rev* **33**,  
653 doi:10.1128/CMR.00102-19 (2019).
- 654 11 Poirel, L., Heritier, C., Tolun, V. & Nordmann, P. Emergence of oxacillinase-mediated  
655 resistance to imipenem in *Klebsiella pneumoniae*. *Antimicrob Agents Chemother* **48**,  
656 15-22, doi:10.1128/aac.48.1.15-22.2004 (2004).
- 657 12 Baquero, F. & Coque, T. M. Multilevel population genetics in antibiotic resistance.  
658 *FEMS Microbiol Rev* **35**, 705-706, doi:10.1111/j.1574-6976.2011.00293.x (2011).
- 659 13 Poirel, L., Bonnin, R. A. & Nordmann, P. Genetic features of the widespread plasmid  
660 coding for the carbapenemase OXA-48. *Antimicrob Agents Chemother* **56**, 559-562,  
661 doi:10.1128/AAC.05289-11 (2012).
- 662 14 Potron, A., Poirel, L., Rondinaud, E. & Nordmann, P. Intercontinental spread of OXA-  
663 48 beta-lactamase-producing Enterobacteriaceae over a 11-year period, 2001 to  
664 2011. *Euro Surveill* **18**, doi:10.2807/1560-7917.es2013.18.31.20549 (2013).
- 665 15 Gijon, D. *et al.* Early OXA-48-Producing Enterobacteriales Isolates Recovered in a  
666 Spanish Hospital Reveal a Complex Introduction Dominated by Sequence Type 11  
667 (ST11) and ST405 *Klebsiella pneumoniae* Clones. *mSphere* **5**,  
668 doi:10.1128/mSphere.00080-20 (2020).
- 669 16 Pano-Pardo, J. R. *et al.* Infections caused by OXA-48-producing *Klebsiella*  
670 *pneumoniae* in a tertiary hospital in Spain in the setting of a prolonged, hospital-wide  
671 outbreak. *J Antimicrob Chemother* **68**, 89-96, doi:10.1093/jac/dks364 (2013).
- 672 17 Hidalgo, L. *et al.* Sequence-based epidemiology of an OXA-48 plasmid during a  
673 hospital outbreak. *Antimicrob Agents Chemother*, doi:10.1128/AAC.01204-19 (2019).
- 674 18 Hernandez-Garcia, M. *et al.* Intestinal co-colonization with different carbapenemase-  
675 producing Enterobacteriales isolates is not a rare event in an OXA-48 endemic area.  
676 *EClinicalMedicine* **15**, 72-79, doi:10.1016/j.eclinm.2019.09.005 (2019).
- 677 19 Haverkate, M. R. *et al.* Within-Host and Population Transmission of blaOXA-48 in *K.*  
678 *pneumoniae* and *E. coli*. *PLoS One* **10**, e0140960, doi:10.1371/journal.pone.0140960  
679 (2015).
- 680 20 Guo, L. *et al.* Nosocomial Outbreak of OXA-48-Producing *Klebsiella pneumoniae* in a  
681 Chinese Hospital: Clonal Transmission of ST147 and ST383. *PLoS One* **11**,  
682 e0160754, doi:10.1371/journal.pone.0160754 (2016).

- 683 21 Gottig, S., Gruber, T. M., Stecher, B., Wichelhaus, T. A. & Kempf, V. A. In vivo  
684 horizontal gene transfer of the carbapenemase OXA-48 during a nosocomial  
685 outbreak. *Clin Infect Dis* **60**, 1808-1815, doi:10.1093/cid/civ191 (2015).
- 686 22 Maechler, F. *et al.* Contact isolation versus standard precautions to decrease  
687 acquisition of extended-spectrum beta-lactamase-producing Enterobacteriales in non-  
688 critical care wards: a cluster-randomised crossover trial. *Lancet Infect Dis*,  
689 doi:10.1016/S1473-3099(19)30626-7 (2020).
- 690 23 Hernandez-Garcia, M. *et al.* Characterization of carbapenemase-producing  
691 Enterobacteriaceae from colonized patients in a university hospital in Madrid, Spain,  
692 during the R-GNOSIS project depicts increased clonal diversity over time with  
693 maintenance of high-risk clones. *J Antimicrob Chemother* **73**, 3039-3043,  
694 doi:10.1093/jac/dky284 (2018).
- 695 24 Crellen, T. *et al.* Transmission dynamics and control of multidrug-resistant *Klebsiella*  
696 pneumoniae in neonates in a developing country. *Elife* **8**, doi:10.7554/eLife.50468  
697 (2019).
- 698 25 Holt, K. E. *et al.* Genomic analysis of diversity, population structure, virulence, and  
699 antimicrobial resistance in *Klebsiella pneumoniae*, an urgent threat to public health.  
700 *Proc Natl Acad Sci U S A* **112**, E3574-3581, doi:10.1073/pnas.1501049112 (2015).
- 701 26 De Maio, N., Wu, C. H. & Wilson, D. J. SCOTTI: Efficient Reconstruction of  
702 Transmission within Outbreaks with the Structured Coalescent. *PLoS Comput Biol*  
703 **12**, e1005130, doi:10.1371/journal.pcbi.1005130 (2016).
- 704 27 Cerqueira, G. C. *et al.* Multi-institute analysis of carbapenem resistance reveals  
705 remarkable diversity, unexplained mechanisms, and limited clonal outbreaks. *Proc*  
706 *Natl Acad Sci U S A* **114**, 1135-1140, doi:10.1073/pnas.1616248114 (2017).
- 707 28 Potron, A., Poirel, L. & Nordmann, P. Derepressed transfer properties leading to the  
708 efficient spread of the plasmid encoding carbapenemase OXA-48. *Antimicrob Agents*  
709 *Chemother* **58**, 467-471, doi:10.1128/AAC.01344-13 (2014).
- 710 29 Lloyd-Smith, J. O., Schreiber, S. J., Kopp, P. E. & Getz, W. M. Superspreading and  
711 the effect of individual variation on disease emergence. *Nature* **438**, 355-359,  
712 doi:10.1038/nature04153 (2005).
- 713 30 Kizny Gordon, A. E. *et al.* The Hospital Water Environment as a Reservoir for  
714 Carbapenem-Resistant Organisms Causing Hospital-Acquired Infections-A  
715 Systematic Review of the Literature. *Clin Infect Dis* **64**, 1435-1444,  
716 doi:10.1093/cid/cix132 (2017).
- 717 31 Decraene, V. *et al.* A Large, Refractory Nosocomial Outbreak of *Klebsiella*  
718 pneumoniae Carbapenemase-Producing *Escherichia coli* Demonstrates  
719 Carbapenemase Gene Outbreaks Involving Sink Sites Require Novel Approaches to  
720 Infection Control. *Antimicrob Agents Chemother* **62**, doi:10.1128/AAC.01689-18  
721 (2018).
- 722 32 Mathers, A. J. *et al.* Intensive Care Unit Wastewater Interventions to Prevent  
723 Transmission of Multispecies *Klebsiella pneumoniae* Carbapenemase-Producing  
724 Organisms. *Clin Infect Dis* **67**, 171-178, doi:10.1093/cid/ciy052 (2018).
- 725 33 Getino, M. & de la Cruz, F. Natural and Artificial Strategies To Control the  
726 Conjugative Transmission of Plasmids. *Microbiol Spectr* **6**,  
727 doi:10.1128/microbiolspec.MTBP-0015-2016 (2018).
- 728 34 Bikard, D. *et al.* Exploiting CRISPR-Cas nucleases to produce sequence-specific  
729 antimicrobials. *Nat Biotechnol* **32**, 1146-1150, doi:10.1038/nbt.3043 (2014).

- 730 35 Lopez-Igual, R., Bernal-Bayard, J., Rodriguez-Paton, A., Ghigo, J. M. & Mazel, D.  
731 Engineered toxin-intein antimicrobials can selectively target and kill antibiotic-  
732 resistant bacteria in mixed populations. *Nat Biotechnol* **37**, 755-760,  
733 doi:10.1038/s41587-019-0105-3 (2019).
- 734 36 Diaz-Agero Perez, C. *et al.* Local prevalence of extended-spectrum beta-lactamase  
735 (ESBL) producing Enterobacteriaceae intestinal carriers at admission and co-  
736 expression of ESBL and OXA-48 carbapenemase in *Klebsiella pneumoniae*: a  
737 prevalence survey in a Spanish University Hospital. *BMJ Open* **9**, e024879,  
738 doi:10.1136/bmjopen-2018-024879 (2019).
- 739 37 Ruiz-Garbajosa, P. *et al.* A single-day point-prevalence study of faecal carriers in  
740 long-term care hospitals in Madrid (Spain) depicts a complex clonal and polyclonal  
741 dissemination of carbapenemase-producing Enterobacteriaceae. *J Antimicrob*  
742 *Chemother* **71**, 348-352, doi:10.1093/jac/dkv355 (2016).
- 743 38 Bolger, A. M., Lohse, M. & Usadel, B. Trimmomatic: a flexible trimmer for Illumina  
744 sequence data. *Bioinformatics* **30**, 2114-2120, doi:10.1093/bioinformatics/btu170  
745 (2014).
- 746 39 Bankevich, A. *et al.* SPAdes: a new genome assembly algorithm and its applications  
747 to single-cell sequencing. *J Comput Biol* **19**, 455-477, doi:10.1089/cmb.2012.0021  
748 (2012).
- 749 40 Gurevich, A., Saveliev, V., Vyahhi, N. & Tesler, G. QUAST: quality assessment tool  
750 for genome assemblies. *Bioinformatics* **29**, 1072-1075,  
751 doi:10.1093/bioinformatics/btt086 (2013).
- 752 41 Seemann, T. Prokka: rapid prokaryotic genome annotation. *Bioinformatics* **30**, 2068-  
753 2069, doi:10.1093/bioinformatics/btu153 (2014).
- 754 42 Ondov, B. D. *et al.* Mash: fast genome and metagenome distance estimation using  
755 MinHash. *Genome Biol* **17**, 132, doi:10.1186/s13059-016-0997-x (2016).
- 756 43 Katz LS, G. T., Morrison SS, Caravas JA, Zhang S, Den Bakker HC, Deng X,  
757 Carleton HA. . Mashree: a rapid comparison of whole genome sequence files. *The*  
758 *journal of open source software* **4**, 1762 (2019).
- 759 44 Nguyen, L. T., Schmidt, H. A., von Haeseler, A. & Minh, B. Q. IQ-TREE: a fast and  
760 effective stochastic algorithm for estimating maximum-likelihood phylogenies. *Mol*  
761 *Biol Evol* **32**, 268-274, doi:10.1093/molbev/msu300 (2015).
- 762 45 Letunic, I. & Bork, P. Interactive Tree Of Life v2: online annotation and display of  
763 phylogenetic trees made easy. *Nucleic Acids Res* **39**, W475-478,  
764 doi:10.1093/nar/gkr201 (2011).
- 765 46 Croucher, N. J. *et al.* Rapid phylogenetic analysis of large samples of recombinant  
766 bacterial whole genome sequences using Gubbins. *Nucleic Acids Res* **43**, e15,  
767 doi:10.1093/nar/gku1196 (2015).
- 768 47 Matsumura, Y., Peirano, G. & Pitout, J. D. D. Complete Genome Sequence of  
769 *Escherichia coli* J53, an Azide-Resistant Laboratory Strain Used for Conjugation  
770 Experiments. *Genome Announc* **6**, doi:10.1128/genomeA.00433-18 (2018).
- 771 48 Simonsen, L., Gordon, D. M., Stewart, F. M. & Levin, B. R. Estimating the rate of  
772 plasmid transfer: an end-point method. *J Gen Microbiol* **136**, 2319-2325,  
773 doi:10.1099/00221287-136-11-2319 (1990).
- 774 49 del Campo, I. *et al.* Determination of conjugation rates on solid surfaces. *Plasmid* **67**,  
775 174-182, doi:10.1016/j.plasmid.2012.01.008 (2012).

776 **Acknowledgements**

777 This work was supported by the European Research Council under the European  
778 Union's Horizon 2020 research and innovation programme (ERC grant agreement no.  
779 757440-PLASREVOLUTION) and by the *Instituto de Salud Carlos III* (co-funded by  
780 European Development Regional Fund "a way to achieve Europe") grants PI16-00860  
781 and CP15-00012. The R-GNOSIS project received financial support from European  
782 Commission (grant R-GNOSIS-FP7-HEALTH-F3-2011-282512). RC acknowledges  
783 financial support from European Commission (R-GNOSIS) and *Plan Nacional de*  
784 *I+D+i2013–2016* and *Instituto de Salud Carlos III, Subdirección General de Redes y*  
785 *Centros de Investigación Cooperativa, Ministerio de Economía, Industria y*  
786 *Competitividad*, Spanish Network for Research in Infectious Diseases  
787 (REPIRD16/0016/0011) co-financed by European Development Regional Fund "A  
788 way to achieve Europe" (ERDF), Operative program Intelligent Growth 2014–2020.  
789 BSC and TC acknowledge support from the UK Medical Research Council and  
790 Department for International Development [grant number MR/K006924/1], and BSC  
791 and PM acknowledge support under the framework of the JPIAMR - Joint  
792 Programming Initiative on Antimicrobial Resistance. ASM is supported by a Miguel  
793 Servet Fellowship (MS15-00012). JRB is a recipient of a Juan de la Cierva-  
794 Incorporación Fellowship (IJC2018-035146-I) co-funded by *Agencia Estatal de*  
795 *Investigación del Ministerio de Ciencia e Innovación*. MH-G was supported with a  
796 contract from *Instituto de Salud Carlos III*, Spain (iP-FIS program, ref. IF114/00022).  
797 We thank the Oxford Genomics Centre at the Wellcome Centre for Human Genetics  
798 (funded by Wellcome Trust grant reference 203141/Z/16/Z) for the generation and  
799 initial processing of the sequencing data.

800 **Author contributions**

801 ASM, RLS and BC conceived the study. RC designed and supervised sampling and  
802 collection of bacterial isolates. MHG, PRG collected the bacterial isolates and

803 performed bacterial characterization. CDA and NLF collected the epidemiological data  
804 and performed preliminary analyses. R-GNOSIS WP5 Study Group designed sampling  
805 protocols and facilitated the training and capacity building for the collection of bacterial  
806 isolates and preliminary analyses. JdLF, JRB and CdIV performed the experimental  
807 work and analysed the results. RLS, BC, PM and TC performed the data analysis.  
808 ASM and RLS wrote the initial draft of the manuscript. ASM, RLS, JdIF, JRB, BC, PM,  
809 and TC contributed to the final version of the manuscript. All authors read and  
810 approved the manuscript.

### 811 **Competing interests**

812 Authors declare no competing interests.

### 813 **Data availability**

814 The sequences generated and analysed during the current study are available in the  
815 Sequence Read Archive (SRA) repository, BioProject ID: PRJNA626430,  
816 <http://www.ncbi.nlm.nih.gov/bioproject/626430>.

### 817 **Code availability**

818 The code generated during the current study is available in GitHub,  
819 [http://www.github.com/leonsampedro/transmission\\_stan\\_code](http://www.github.com/leonsampedro/transmission_stan_code).

820 **Supplementary tables**

821 Supplementary Table 2. Transmission models to study the daily probability of  
 822 acquisition of pOXA-48-carrying enterobacteria by hospitalised patients.

| Model | Parameters                         | Priors                   | <i>K. pneumoniae</i>                    |                   | <i>E. coli</i>                          |                   |
|-------|------------------------------------|--------------------------|-----------------------------------------|-------------------|-----------------------------------------|-------------------|
|       |                                    |                          | Posterior Median (95% CrI) <sup>1</sup> | WAIC <sup>2</sup> | Posterior Median (95% CrI) <sup>1</sup> | WAIC <sup>2</sup> |
| 1     | $\alpha$ (intercept)               | Normal (0, 10)           | -6.787 (-6.9797, -6.6019)               | 1411              | -7.633 (-7.9330, -7.3640)               | 705               |
| 2     | $\alpha$ (intercept)               | Normal (0, 10)           | -6.897 (-7.1103, -6.6990)               | 1402              | -7.716 (-8.0609, -7.4121)               | 704               |
|       | $\beta$ (between-patient transfer) | Normal (0, 10)           | 1.0611 (0.4981, 1.4857)                 |                   | 0.8333 (-0.7172, 1.5460)                |                   |
| 3     | $\alpha$ (intercept)               | Normal (0, 10)           | -6.893 (-7.1098, -6.7027)               | 1397              | -7.699 (-8.0255, -7.4054)               | 706               |
|       | $\beta$ (between-patient transfer) | Normal ( $\mu, \sigma$ ) | Varies by ward                          |                   | Varies by ward                          |                   |
|       | M (beta mean)                      | Normal (0, 10)           | 0.6697 (-2.3853, 2.6142)                |                   | 0.0665 (-4.5453, 2.3773)                |                   |
|       | $\Sigma$ (beta standard deviation) | Normal (0, 5)            | 1.5789 (0.4050, 6.3881)                 |                   | 1.4629 (0.2166, 7.6397)                 |                   |
| 4     | $\alpha$ (intercept)               | Normal (0, 10)           | -6.919 (-7.1521, -6.7088)               | 1394              | -7.827 (-8.1749, -7.5305)               | 682               |
|       | $\beta$ (between-patient transfer) | Normal (0, 10)           | 1.0724 (0.3978, 1.4903)                 |                   | 0.6875 (-0.9421, 1.4782)                |                   |
|       | $\gamma$ (within-patient transfer) | Normal (0, 10)           | 2.7390 (1.2877, 3.7049)                 |                   | 3.034 (2.0509, 3.8361)                  |                   |
| 5     | $\alpha$ (intercept)               | Normal (0, 10)           | -6.924 (-7.1401, -6.7253)               | 1388              | -7.836 (-8.1921, -7.5285)               | 682               |
|       | $\beta$ (between-patient transfer) | Normal ( $\mu, \sigma$ ) | Varies by ward                          |                   | Varies by ward                          |                   |
|       | M (beta mean)                      | Normal (0, 10)           | 0.7198 (-3.0451, 2.9985)                |                   | -0.2390 (-5.9522, 2.3138)               |                   |
|       | $\Sigma$ (beta standard deviation) | Normal (0, 5)            | 1.5960 (0.3937, 6.7936)                 |                   | 1.9315 (0.3361, 8.3896)                 |                   |
|       | $\gamma$ (within-patient transfer) | Normal (0, 10)           | 2.7360 (1.2051, 3.7623)                 |                   | 3.124 (2.1074, 3.9739)                  |                   |

823

824 The table shows the parameters, prior and posterior distributions along with the WAIC  
 825 (model comparison measure where lower values indicate a better fit to data). See  
 826 methods for equations. Normal prior distributions show the mean and standard  
 827 deviation respectively within brackets. <sup>1</sup> 95% Credible interval. <sup>2</sup> Widely applicable  
 828 information criterion (WAIC).

829



830 Supplementary Table 3. Risk factors and the daily probability for acquisition of pOXA-  
 831 48-carrying enterobacteria by hospitalised patients.

| Variable                                               | Daily Probability of Acquisition <sup>1</sup><br>Posterior Median (95% CrI <sup>2</sup> ) |                            |
|--------------------------------------------------------|-------------------------------------------------------------------------------------------|----------------------------|
|                                                        | <i>K. pneumoniae</i>                                                                      | <i>E. coli</i>             |
| Baseline                                               | 0.00098 (0.00079, 0.00120)                                                                | 0.00040 (0.00028, 0.00054) |
| Other patients colonised ( $\beta$ ) <sup>3</sup>      |                                                                                           |                            |
| Neurosurgery                                           | 0.00650 (0.00276, 0.01089)                                                                | 0.00012 (2.39E-9, 0.00117) |
| Gastroenterology                                       | 0.00163 (0.00034, 0.00385)                                                                | 0.00072 (4.86E-5, 0.00254) |
| Pneumology                                             | 0.00268 (0.00115, 0.00445)                                                                | 0.00099 (0.00012, 0.00216) |
| Urology                                                | 0.00056 (3.34E-7, 0.00381)                                                                | 0.00016 (5.88E-9, 0.00178) |
| Previously colonised patient ( $\gamma$ ) <sup>4</sup> | 0.01489 (0.00330, 0.04009)                                                                | 0.00889 (0.00336, 0.01917) |

832

833 Daily probability of acquisition of pOXA-48-carrying *K. pneumoniae* or *E. coli* among  
 834 patients admitted to the four different wards during the study period of the R-GNOSIS  
 835 project. <sup>1</sup> Probability of acquisition is the posterior intercept plus the posterior  
 836 coefficients transformed onto the probability scale. <sup>2</sup> Credible Interval of Posterior  
 837 Distribution. <sup>3</sup> Risk of between-patient transfer: other patients already colonised by a  
 838 pOXA-48-carrying enterobacteria each day, divided by ward. <sup>4</sup> Risk of within-patient  
 839 transfer: patient previously colonised by a pOXA-48-carrying enterobacteria of the  
 840 different species.

841 **Supplementary figures**

842 Supplementary Figure 1. Plasmid pOXA-48.

843

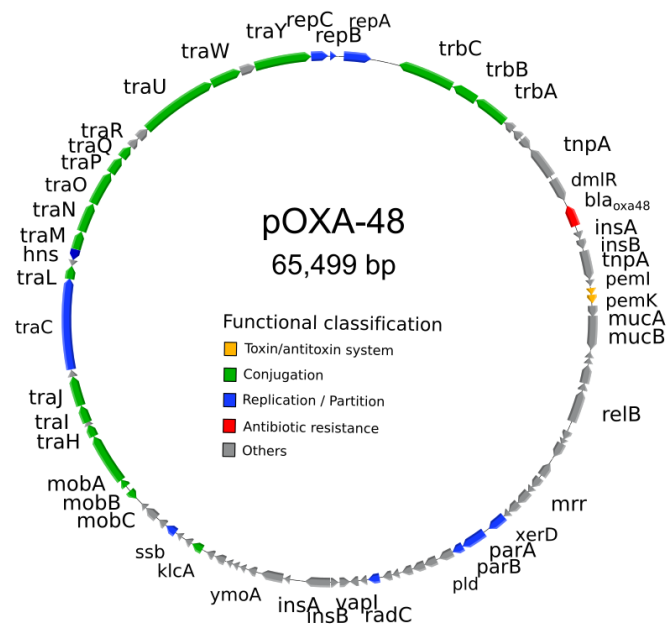

844

845 Schematic representation of plasmid pOXA-48. The reading frames for genes are

846 shown as arrows, with the direction of transcription indicated by the arrowhead. Arrow

847 colours indicate the functional classification of the gene (see legend). The *bla<sub>OXA-48</sub>*

848 gene is indicated in red.

849 Supplementary Figure 2. Phylogenetic analysis of isolates preliminary identified as *K.*

850 *pneumoniae*.

851

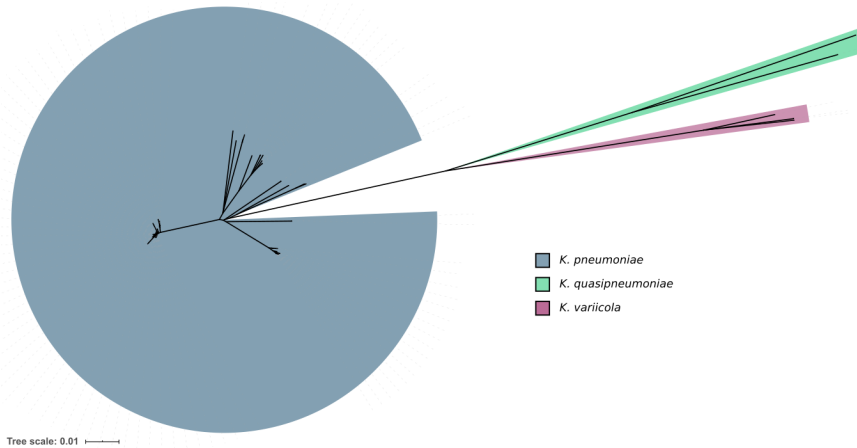

854 Unrooted phylogeny of 108 whole genome assemblies from the clones phenotypically

855 identified as *K. pneumoniae*. Branch length gives the mash distance (a measure of k-

856 mer similarity) between assemblies. Note the three distinct clusters, which are

857 considered to be separate species (distance > 0.05): *K. pneumoniae* (n= 103), *K.*

858 *quasipneumoniae* (n= 2) and *K. variicola* (n= 3).

859 Supplementary Figure 3. *K. pneumoniae* ST11 between-patient transfer dynamics in  
860 the neurosurgery ward.

861

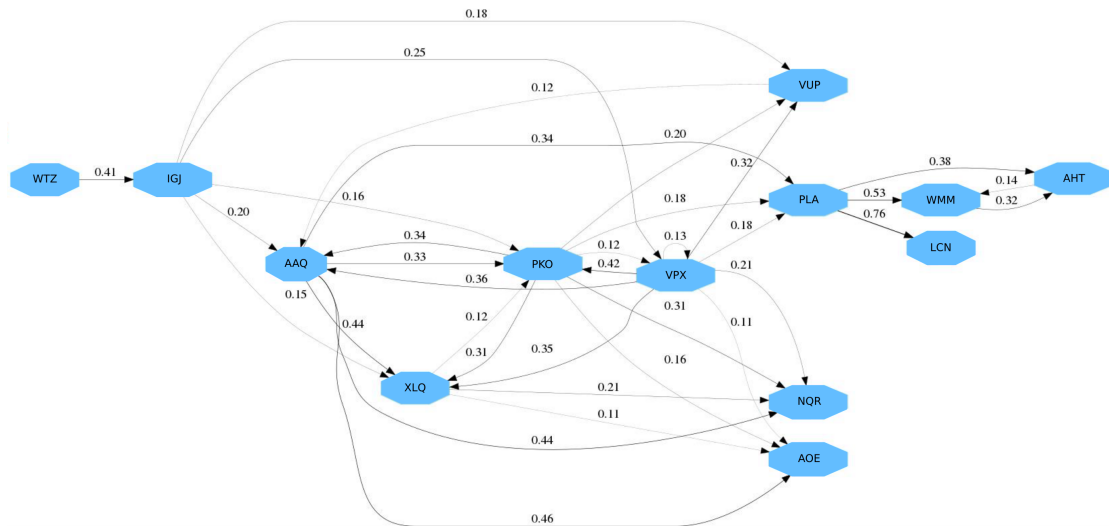

862

863

864 Transmission events of *K. pneumoniae* ST11 carrying plasmid pOXA-48 predicted by  
865 SCOTTI in the neurosurgery ward. Blue boxes represent patients, with patient codes  
866 indicated within the box. Lines represent the predicted between-patient transfer  
867 events, and the number above the lines indicate the probability of the transfer event.

868 Supplementary Figure 4. *K. pneumoniae* ST11 between-patient transfer dynamics in  
869 the gastroenterology ward.

870

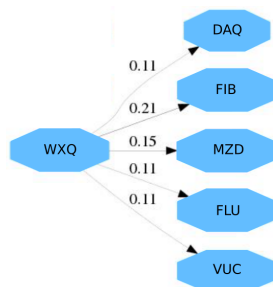

871

872

873 Transmission events of *K. pneumoniae* ST11 carrying plasmid pOXA-48 predicted by  
874 SCOTTI in the gastroenterology ward. Blue boxes represent patients, with patient  
875 codes indicated within the box. Lines represent the predicted between-patient transfer  
876 events, and the number above the lines indicate the probability of the transfer event.

877 Supplementary Figure 5. *K. pneumoniae* ST11 between-patient transfer dynamics in  
878 the pneumology ward.

879

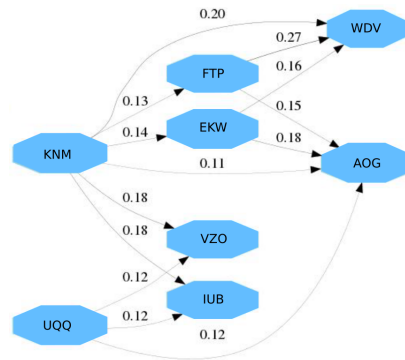

880

881

882 Transmission events of *K. pneumoniae* ST11 carrying plasmid pOXA-48 predicted by  
883 SCOTTI in the pneumology ward. Blue boxes represent patients, with patient codes  
884 indicated within the box. Lines represent the predicted between-patient transfer  
885 events, and the number above the lines indicate the probability of the transfer event.

886 Supplementary Figure 6. *K. pneumoniae* ST11 between-patient transfer dynamics in  
887 the urology ward.

888

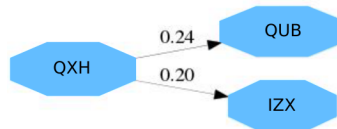

889

890

891

892 Transmission events of *K. pneumoniae* ST11 carrying plasmid pOXA-48 predicted by  
893 SCOTTI in the urology ward. Blue boxes represent patients, with patient codes  
894 indicated within the box. Lines represent the predicted between-patient transfer  
895 events, and the number above the lines indicate the probability of the transfer event.

896 Supplementary Figure 7. *K. pneumoniae* ST11 between-patient transfer dynamics  
897 across all the wards.

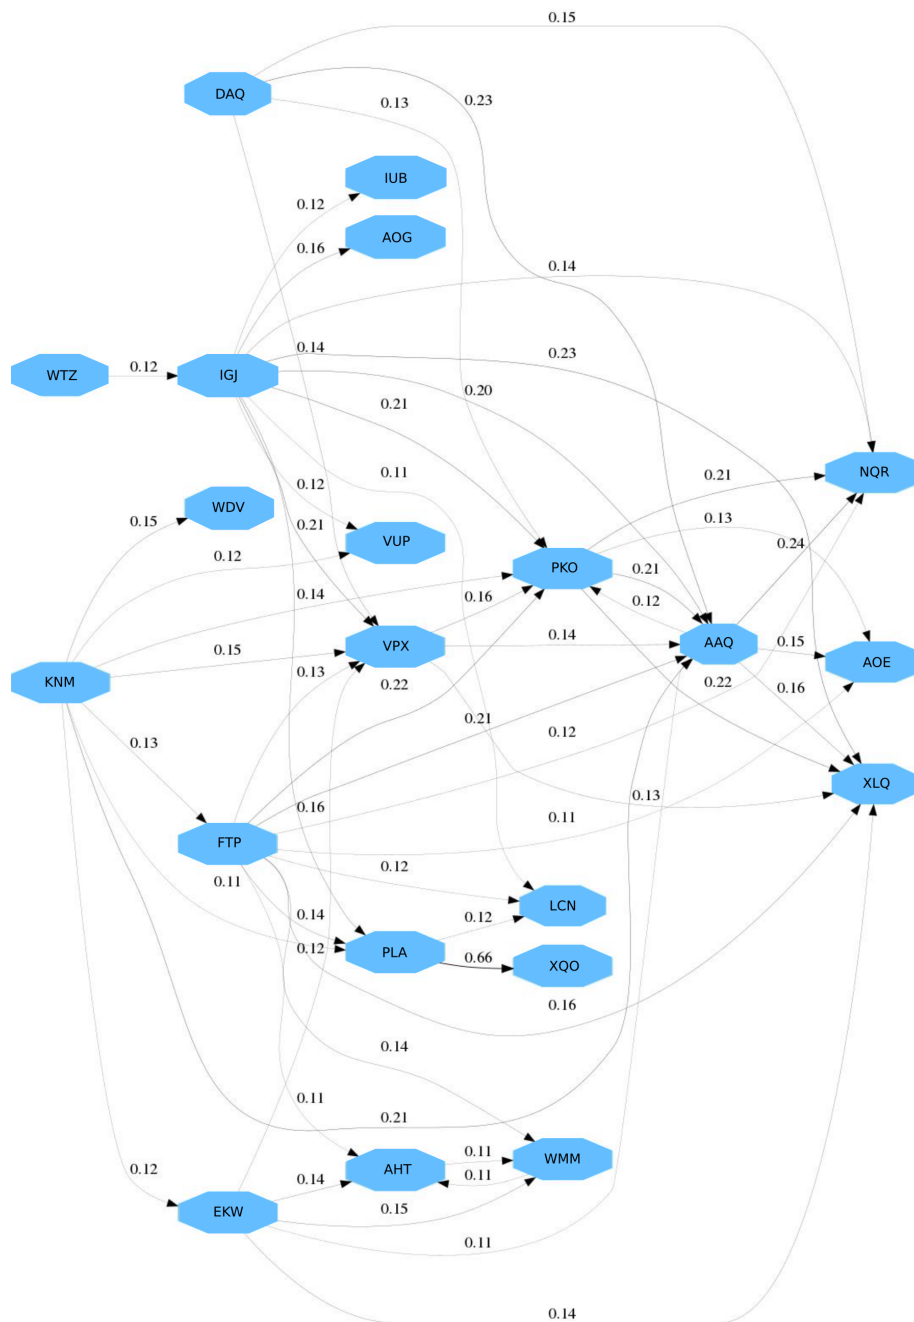

898

899 Transmission events of *K. pneumoniae* ST11 carrying plasmid pOXA-48 predicted by  
900 SCOTTI when combining patients from the four wards. Blue boxes represent patients,  
901 with patient codes indicated within the box. Lines represent the predicted between-  
902 patient transfer events, and the number above the lines indicate the probability of the  
903 transfer event.



904 Supplementary Figure 8. *K. pneumoniae* ST15 between-patient transfer dynamics

905 across all the wards.

906

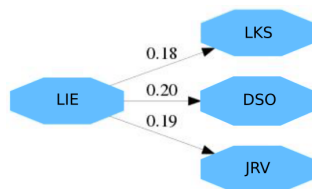

907

908

909 Transmission events of *K. pneumoniae* ST15 carrying plasmid pOXA-48 predicted by

910 SCOTTI when combining patients from the four wards. Blue boxes represent patients,

911 with patient codes indicated within the box. Lines represent the predicted between-

912 patient transfer events, and the number above the lines indicate the probability of the

913 transfer event.

914 Supplementary Figure 9. *K. pneumoniae* ST307 between-patient transfer dynamics in  
915 the pneumology ward.

916

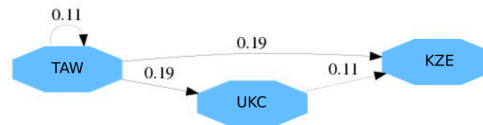

917

918

919 Transmission events of *K. pneumoniae* ST307 carrying plasmid pOXA-48 predicted by  
920 SCOTTI in the pneumology ward. Blue boxes represent patients, with patient codes  
921 indicated within the box. Lines represent the predicted between-patient transfer  
922 events, and the number above the lines indicate the probability of the transfer event.

923 Supplementary Figure 10. *E. coli* ST10 between-patient transfer dynamics across all  
924 the wards.

925

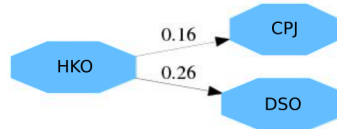

926

927

928 Transmission events of *E. coli* ST10 carrying plasmid pOXA-48 predicted by SCOTTI  
929 when combining patients from the four wards. Blue boxes represent patients, with  
930 patient codes indicated within the box. Lines represent the predicted between-patient  
931 transfer events, and the number above the lines indicate the probability of the transfer  
932 event.

933 Supplementary Figure 11. Spatiotemporal distribution of patients colonised by *K.*  
934 *pneumoniae* ST11 in the neurosurgery ward.

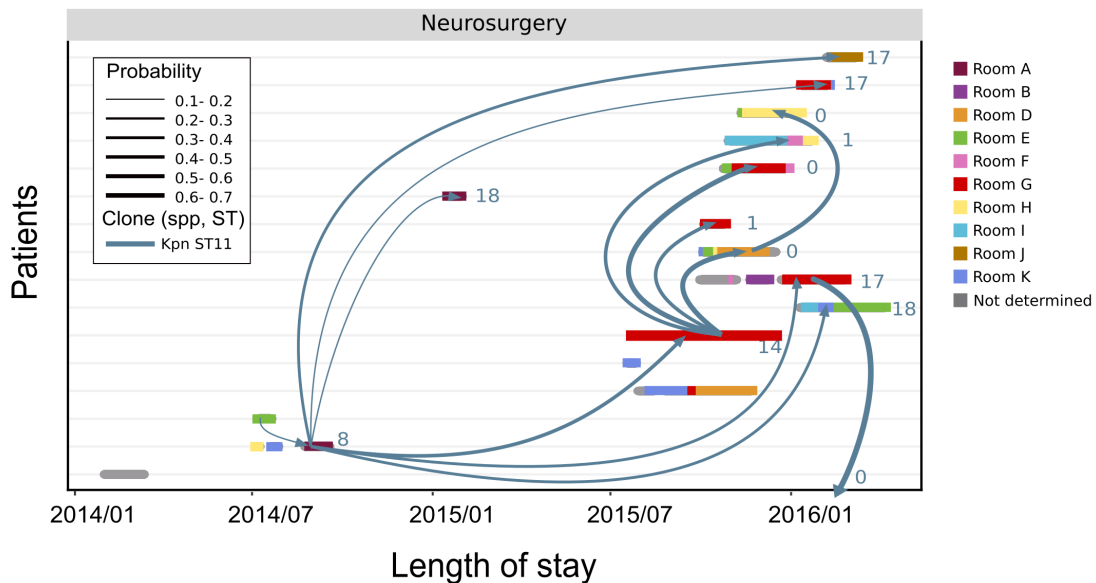

935

936

937 Distribution of patients colonised by pOXA-48-carrying *K. pneumoniae* ST11 in the  
938 neurosurgery ward. Each row represents a patient and the colour segments represent  
939 the length of stay in the hospital (from admission to discharge). The colours of the  
940 segments represent the different rooms within the ward (see legend). Arrows represent  
941 transmission events predicted by SCOTTI. Line thickness represents the probability of  
942 the transmission predicted by SCOTTI. The number to the right of the arrowhead  
943 indicates the number of SNPs between the complete genomes of the pair of clones  
944 involved in the putative transmission event. Note that 6 out of 16 patients shared room  
945 G in overlapping stays.

946 Supplementary Figure 12. pOXA-48-carrying enterobacteria analysed in this study.

947

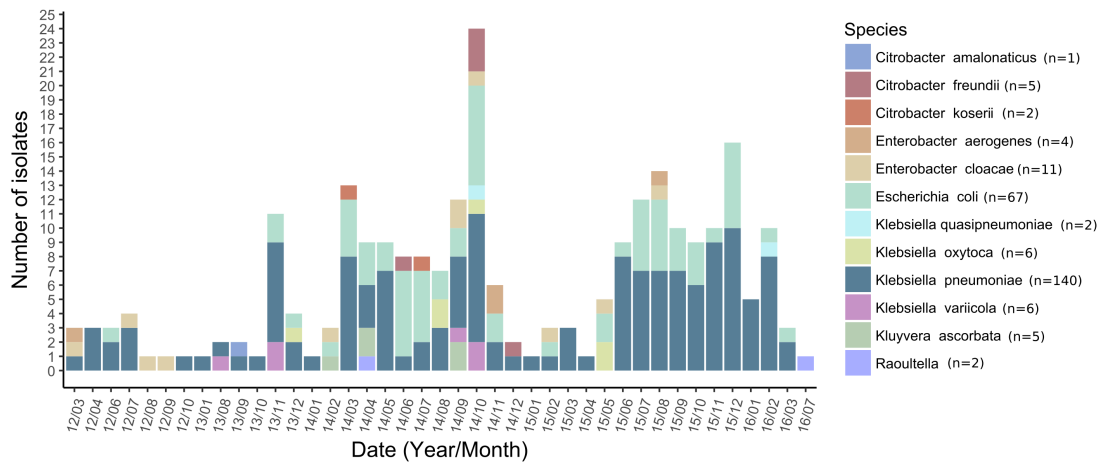

948

949

950 Representation of the 250 pOXA-48-carrying clones isolated in the hospital from the  
951 first description till the end of the study period. The colour code indicates the species  
952 of the pOXA-48-carrying enterobacteria as indicated in the legend.

953 Supplementary Figure 13. Frequency of conjugation of plasmid pOXA-48.

954

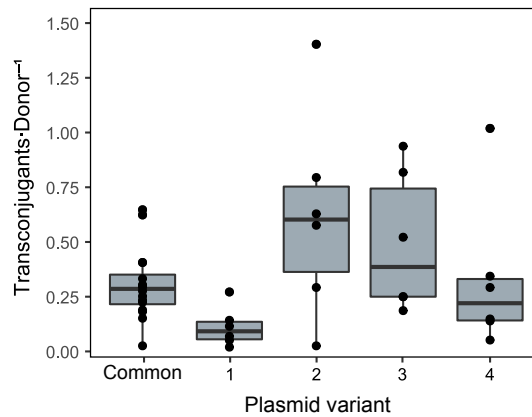

955

956

957 Conjugation frequencies (transconjugants per donor) of the most common pOXA-48  
958 variant in the hospital (common, n= 12 biological replicates) and the four variants with  
959 SNPs in the core region used to track within-patient plasmid transfer (n= 6 biological  
960 replicates). Plasmid variant numbers correspond to those indicated in Figure 5. The  
961 line inside the box marks the median. The upper and lower hinges correspond to the  
962 25th and 75th percentiles and whiskers extend to observations within 1.5 times the  
963 interquartile range. The data presented here is the same as in figure 6, but represented  
964 as conjugation frequency instead of rate.
